# Supplementary material for: Blood pressure variability and cardiovascular disease: systematic review and meta-analysis
Source: PubMed Central journal article supplement (PMC4979357; doi:10.1136/bmj.i4098), 2016-08-09
Supplement: stes029896.ww1_default.pdf [file stes029896.ww1_default.pdf]

## Online supplement

**Table e1: Search strategy**

### **CINAHL (EBSCOHost)**

S24 S22 OR S23 Limiters - Clinical Queries: Prognosis - Specificity  
S23 S20 OR S21 Limiters - Clinical Queries: Prognosis - High Sensitivity  
S22 S20 OR S21  
S21 TI ( ((blood pressure or bp or sbp or dbp) N5 (variabilit\* or variation\*)) ) OR AB ( ((blood pressure or bp or sbp or dbp) N5 (variabilit\* or variation\*)) )  
S20 S3 AND S6 AND S19  
S19 S7 OR S8 OR S9 OR S10 OR S11 OR S12 OR S13 OR S14 OR S15 OR S16 OR S17 OR S18  
S18 TI within subject\* OR AB within subject\*  
S17 TI ( (dipping or dipper\* or nondipping or nondipper\* or non-dipping or non-dipper\*) ) OR AB ( (dipping or dipper\* or nondipping or nondipper\* or non-dipping or non-dipper\*) )  
S16 TI ( (((daytime or day-time or diurnal) N5 (blood pressure or bp or sbp or sbp)) and ((night-time or nocturnal) N5 (blood pressure or bp or sbp or sbp))) ) OR AB ( (((daytime or day-time or diurnal) N5 (blood pressure or bp or sbp or sbp)) and ((night-time or nocturnal) N5 (blood pressure or bp or sbp or sbp))) )  
S15 TI ( ((daytime or day-time or diurnal) N5 (night-time or nocturnal)) ) OR AB ( ((daytime or day-time or diurnal) N5 (night-time or nocturnal)) )  
S14 TI repeat\* measure\* OR AB repeat\* measure\*  
S13 TI "measure\* to measure\*" OR AB "measure\* to measure\*"  
S12 TI ( ("day to day" or "day by day") ) OR AB ( ("day to day" or "day by day") )  
S11 TI ( "between day" OR "within day" ) OR AB ( "between day" OR "within day" )  
S10 TI "visit to visit" OR AB "visit to visit"  
S9 TI ( ((between or within) N3 visit\*) ) OR AB ( ((between or within) N3 visit\*) )  
S8 TI variation\*  
S7 TI ( variability or variabilities ) OR AB ( variability or variabilities )  
S6 S4 OR S5  
S5 TI ( blood pressure or bp or sbp or dbp ) OR AB ( blood pressure or bp or sbp or dbp )  
S4 (MH "Blood Pressure") OR (MH "Blood Pressure Determination")  
S3 S1 OR S2  
S2 TI ( hypertensive\* or hypertension\* or antihypertens\* or anti-hypertens\* ) OR AB ( hypertensive\* or hypertension\* or antihypertens\* or anti-hypertens\* )  
S1 (MH "Hypertension+")

### **Embase (OvidSP)**

1 \*hypertension/  
2 (hypertensive\* or hypertension\* or antihypertens\* or anti-hypertens\*).ti,ab.  
3 1 or 2  
4 \*Blood Pressure/  
5 exp \*blood pressure measurement/  
6 (blood pressure or bp or sbp or dbp).ti,ab.  
7 4 or 5 or 6  
8 (variability or variabilities).ti,ab.  
9 variation?.ti.  
10 ((between or within) adj3 visit?).ti,ab.  
11 "visit to visit".ti,ab.  
12 ((between or within) adj day?).ti,ab.  
13 ("day to day" or "day by day").ti,ab.  
14 "measure\* to measure\*".ti,ab.  
15 "reading? to reading?".ti,ab.  
16 repeat\* measure\*.ti,ab.  
17 ((daytime or day-time or diurnal) adj5 (night-time or nocturnal)).ti,ab.  
18 (((daytime or day-time or diurnal) adj5 (blood pressure or bp or sbp or sbp)) and ((night-time or nocturnal) adj5 (blood pressure or bp

- or sbp or sbp)))ti,ab.
- 19 (dipping or dipper? or nondipping or nondipper? or non-dipping or non-dipper?).ti,ab.
- 20 within subject?.ti,ab.
- 21 8 or 9 or 10 or 11 or 12 or 13 or 14 or 15 or 16 or 17 or 18 or 19 or 20
- 22 3 and 7 and 21
- 23 blood pressure variability/
- 24 3 and 23
- 25 ((blood pressure or bp or sbp or dbp) adj5 (variabilit\* or variation?)).ti,ab.
- 26 22 or 24 or 25
- 27 ((exp animal/ or exp vertebrate/ or exp invertebrate/) not human/) or animal experiment/ or animal model/ or animal tissue/ or animal cell/ or nonhuman/
- 28 26 not 27
- 29 follow up.mp. or ep.fs. or prognos\*.tw.
- 30 28 and 29
- 31 (prognos\* or survival).tw.
- 32 28 and 31
- 33 30 or 32

**Medline (OvidSP)**

- 1 exp Hypertension/
- 2 (hypertensive\* or hypertension\* or antihypertens\* or anti-hypertens\*).ti,ab.
- 3 1 or 2
- 4 \*Blood Pressure/
- 5 \*Blood Pressure Determination/
- 6 (blood pressure or bp or sbp or dbp).ti,ab.
- 7 4 or 5 or 6
- 8 (variability or variabilities).ti,ab.
- 9 variation?.ti.
- 10 ((between or within) adj3 visit?).ti,ab.
- 11 "visit to visit".ti,ab.
- 12 ((between or within) adj day?).ti,ab.
- 13 ("day to day" or "day by day").ti,ab.
- 14 "measure\* to measure\*".ti,ab.
- 15 "reading? to reading?".ti,ab.
- 16 repeat\* measure\*.ti,ab.
- 17 ((daytime or day-time or diurnal) adj5 (night-time or nocturnal)).ti,ab.
- 18 (((daytime or day-time or diurnal) adj5 (blood pressure or bp or sbp or sbp)) and ((night-time or nocturnal) adj5 (blood pressure or bp or sbp or sbp))).ti,ab.
- 19 (dipping or dipper? or nondipping or nondipper? or non-dipping or non-dipper?).ti,ab.
- 20 within subject?.ti,ab.
- 21 8 or 9 or 10 or 11 or 12 or 13 or 14 or 15 or 16 or 17 or 18 or 19 or 20
- 22 3 and 7 and 21
- 23 ((blood pressure or bp or sbp or dbp) adj5 (variabilit\* or variation?)).ti,ab.
- 24 22 or 23
- 25 exp animal/ not human/
- 26 24 not 25
- 27 incidence.sh. or exp mortality/ or follow-up studies.sh. or prognos\*.tw. or predict\*.tw. or course\*.tw.
- 28 26 and 27
- 29 (prognos\* or first episode or cohort).tw.
- 30 26 and 29
- 31 28 or 30

Web of Science:

- # 17 #16 AND #15
- # 16 Topic=(prognos\* OR cohort\* OR incidence OR mortality OR "follow-up" OR predict OR course)
- # 15 #14 AND #13
- # 14 Topic=(hypertens\* OR antihypertens\* OR anti-hypertens\*)
- # 13 #12 OR #2 OR #1
- # 12 #11 AND #3
- # 11 #10 OR #9 OR #8 OR #5 OR #4
- # 10 Topic=("within subject\*")
- # 9 Topic=(dipping or dipper\* or nondipping or nondipper\* or non-dipping or non-dipper\*)
- # 8 #7 AND #6
- # 7 Topic=(nighttime NEAR/5 ("blood pressure" or bp or sbp or dbp)) OR Topic=(nocturnal NEAR/5 ("blood pressure" or bp or sbp or dbp))
- # 6 Topic=(daytime NEAR/5 ("blood pressure" or bp or sbp or dbp)) OR Topic=(day-time NEAR/5 ("blood pressure" or bp or sbp or dbp)) OR Topic=(diurnal NEAR/5 ("blood pressure" or bp or sbp or dbp))
- # 5 Topic=((daytime NEAR/5 (night-time or nocturnal))) OR Topic=((day-time NEAR/5 (night-time or nocturnal))) OR Topic=((diurnal NEAR/5 (night-time or nocturnal)))
- # 4 Topic=(between NEAR/3 visit\*) OR Topic=(within NEAR/3 visit\*) OR Topic=("between day\*" OR "within day\*") OR Topic=("day to day" OR "day by day") OR Topic=("measure to measure") OR Topic=("measurement to measurement") OR Topic=("repeat measur\*" OR "repeated measur\*") OR Topic=("visit to visit") OR Topic=("reading to reading" OR "readings to readings")
- # 3 Topic=("blood pressure" OR bp OR sbp OR dbp)
- # 2 Title=(variation\* OR variability OR variabilities) AND Title=("blood pressure" OR bp OR sbp OR dbp)
- # 1 Topic=("blood pressure" NEAR/5 (variability OR variabilities OR variation\*)) OR Topic=(bp NEAR/5 (variability OR variabilities OR variation\*)) OR Topic=(dbp NEAR/5 (variability OR variabilities OR variation\*)) OR Topic=(sbp NEAR/5 (variability OR variabilities OR variation\*))

**Table e2: Extracted information**

|                                                                                                                                                                                                                                                                                                                                                                                                                                                 |                                                                                                                                                                                                                                                       |
|-------------------------------------------------------------------------------------------------------------------------------------------------------------------------------------------------------------------------------------------------------------------------------------------------------------------------------------------------------------------------------------------------------------------------------------------------|-------------------------------------------------------------------------------------------------------------------------------------------------------------------------------------------------------------------------------------------------------|
| <b>Patient characteristics</b>                                                                                                                                                                                                                                                                                                                                                                                                                  |                                                                                                                                                                                                                                                       |
| <ul style="list-style-type: none"><li>• Number of participants</li><li>• Age</li><li>• Proportion on anti-hypertensive medication</li></ul>                                                                                                                                                                                                                                                                                                     | <ul style="list-style-type: none"><li>• Gender</li><li>• Source population</li></ul>                                                                                                                                                                  |
| <b>Study characteristics</b>                                                                                                                                                                                                                                                                                                                                                                                                                    |                                                                                                                                                                                                                                                       |
| <ul style="list-style-type: none"><li>• Type of monitoring</li><li>• Measurement device used*</li><li>• Person taking readings*</li><li>• Length of monitoring period</li><li>• Length of follow-up</li><li>• Authors overall conclusion</li></ul>                                                                                                                                                                                              | <ul style="list-style-type: none"><li>• Type of study (trial/ observational)</li><li>• Measurement arm*</li><li>• Cuff size used*</li><li>• Outcomes studied</li><li>• Variability measures studied</li></ul>                                         |
| <b>Statistical analysis</b>                                                                                                                                                                                                                                                                                                                                                                                                                     |                                                                                                                                                                                                                                                       |
| <ul style="list-style-type: none"><li>• Analysis strategy</li><li>• Variability measure</li><li>• Systolic or diastolic BP</li><li>• Reported hazard ratio/ 95% confidence interval</li><li>• Adjustment for equivalent mean BP*</li><li>• Regression to the mean considered*</li><li>• Medication change during measurement period limited/ adjusted for*</li><li>• Medication change during follow-up period limited/ adjusted for*</li></ul> | <ul style="list-style-type: none"><li>• Definition of a single measurement</li><li>• Outcome</li><li>• Units of reported hazard ratio</li><li>• Standard deviation of variability measure</li><li>• Diurnal/ Seasonal variation considered*</li></ul> |

\*considered as potential confounders of the effect of BP variability on outcomes.

**Table e3: Standardized hazard ratios explanation**

A standardized beta coefficient is calculated as the beta coefficient per unit of the standardized exposure (the exposure divided by its sample SD). For proportional hazards models, the beta-coefficient is the logarithm of the hazard ratio. For example, for Eguchi et al. (2012) reported that the standard deviation of clinic SBP standard deviation is 4.6 mm Hg and the univariate HR per 5 mm Hg of SBP SD is 1.158; hence the beta coefficient is 0.457 per 5 mm Hg, the standardized beta coefficient is 0.421 per SD (of SD) and the standardized hazard ratio is 1.52 per SD. This has an interpretation as “hazard ratio per one SD of SBP SD”. Because our exposure measurements include SD of SBP, and the phrase “hazard ratio per one SD of SD” may not promote clarity, we use the term “standardized hazard ratio” rather than “hazard ratio per one SD”.

**Table e4: Included study characteristics**

| Paper, Year (Country)                                                             | Study                   | Population                                                                                                                                                                           | N    | Frequency of measurement               | Measure of Variability                 | Follow-up                               | Antihypertensive medication | Outcome Measure                                                             |
|-----------------------------------------------------------------------------------|-------------------------|--------------------------------------------------------------------------------------------------------------------------------------------------------------------------------------|------|----------------------------------------|----------------------------------------|-----------------------------------------|-----------------------------|-----------------------------------------------------------------------------|
| <b>Short term BP variability measured through ambulatory BP monitoring (ABPM)</b> |                         |                                                                                                                                                                                      |      |                                        |                                        |                                         |                             |                                                                             |
| Bjorklund, 2004[1] (Sweden)                                                       | ULSAM (observational)   | 70 year old men (Uppsala Longitudinal Study of Adult Men). Mean age 71. 100% male.                                                                                                   | 872  | Every 20 mins                          | SD                                     | 9.5 years (max, mean 6.6 +/- 2.1 years) | 30.0%                       | CVD events                                                                  |
| Eguchi, 2012[2] (Japan)                                                           | Observational           | Asymptomatic patients aged 33-88 attending general internal medicine clinics at three institutes in Japan, for the evaluation and management of hypertension. Mean age 67. 38% male. | 457  | Every 30 mins                          | SD                                     | 66 months (mean)                        | 55.6%                       | Hard and all CVD events                                                     |
| Gavish, 2009[3] (Israel)                                                          | Observational           | Non pregnant, greater than 16 years old, good quality ABPM. Mean age 56. 45% male                                                                                                    | 3433 | Every 20 mins (day) or 30 mins (night) | SD, CV, day/night SD ratio             | 7.6 years (mean, max 16 years)          | 59.0%                       | All-cause mortality                                                         |
| Gavish, 2015[4] (Israel)                                                          | Observational           | Hypertensive patients included in the ambulatory BP (ABP) measurement service database. Mean age 57. 46% male. (analysis of subset of Gavish, 2009)                                  | 1246 | Every 20 mins (day) or 30 mins (night) | SD, ratio of systolic and diastolic SD | 5 years                                 | 61.0%                       | All-cause mortality                                                         |
| Hansen, 2010[5] (Worldwide)                                                       | IDACO (observational)   | Multiple different populations in ABPM database. Mean age 53. 53% male. [IDACO]                                                                                                      | 8939 | Every 30 mins                          | SD, ARV, mean of day and night SD      | 11.3 years (median)                     | 19.6%                       | All-cause mortality, CVD mortality, CVD events, cardiac and coronary events |
| Kikuya, 2000[6] (Japan)                                                           | Ohasama (observational) | Japanese general population > 40 years (mean age 61.7, men: women=40:60)                                                                                                             | 1542 | Every 30 mins                          | SD                                     | 8.5 years (mean)                        | 30.9%                       | CVD mortality                                                               |
| Mancia, 2007[7] (Italy)                                                           | PAMELA (observational)  | Randomly selected individuals in Milan aged 25-74 years. Mean age 51. 50% male.                                                                                                      | 2012 | Every 20 mins                          | SD                                     | 148 months (max follow-up)              | Not stated                  | All-cause mortality and CVD mortality                                       |

| <b>Paper, Year (Country)</b>   | <b>Study</b>                      | <b>Population</b>                                                                                                                                                                                                                                                                                                                                                          | <b>N</b>                                | <b>Frequency of measurement</b>                        | <b>Measure of Variability</b> | <b>Follow-up</b>                         | <b>Antihypertensive medication</b>      | <b>Outcome Measure</b>                                                                   |
|--------------------------------|-----------------------------------|----------------------------------------------------------------------------------------------------------------------------------------------------------------------------------------------------------------------------------------------------------------------------------------------------------------------------------------------------------------------------|-----------------------------------------|--------------------------------------------------------|-------------------------------|------------------------------------------|-----------------------------------------|------------------------------------------------------------------------------------------|
| Mena, 2014[8] (Worldwide)      | IDACO (observational)             | Discovery data: - subset of IDACO, Copenhagen cohort subjects equally distributed among the 2 sexes and among 4 age wit complete ABPM readings groups (41, 51, 61, and 71 years). Test data: IDACO subjects 18+, at least 10 daytime readings, 5 night-time readings, and 48 readings over 24 hours and were not included in the discovery dataset. Mean age 54. 54% male. | 1254 (discovery data), 5353 (test data) | Every 15 to 30 minutes (day) and 30 to 60 mins (night) | ARV                           | 10.2 years (median, test data)           | 21.3% (test data)                       | All-cause mortality, CVD mortality, CHD mortality, CVD events, CHD events, stroke events |
| Palatini, 2014[9] (Worldwide)  | ABP-International (observational) | Ambulatory BP International Study: combination of 8 prospective studies of random samples of patients referred to hospital for hypertension. Untreated patients with entry office BP >140/90 mmHg. Mean age 51. 56% male.                                                                                                                                                  | 7112                                    | Every 10 to 30 mins (day) and 15 to 30 mins (night)    | SD, CV                        | 5.5 years (median)                       | No - untreated population               | CVD events and CVD mortality                                                             |
| Pierdomenico, 2005[10] (Italy) | Abruzzo, Italy (observational)    | Uncomplicated mild clinic hypertensives. Mean age 49. 54% male.                                                                                                                                                                                                                                                                                                            | 1088                                    | Every 15 mins (day) and 30 mins (night)                | SD                            | 4.74 years (mean)                        | 87% at follow-up                        | CVD events                                                                               |
| Pierdomenico, 2006[11] (Italy) | Abruzzo, Italy (observational)    | Hypertensive patients undergoing ABPM in Italy. Mean age 59. 47% male.                                                                                                                                                                                                                                                                                                     | 1472                                    | Every 15 mins (day) and 30 mins (night)                | SD                            | 4.88 years (mean)                        | 100.0%                                  | CVD events                                                                               |
| Pierdomenico, 2009[12] (Italy) | Abruzzo, Italy (observational)    | Hypertensive patients age 40+ years who were referred for an outpatient evaluation for hypertension in Italy. Mean age 58. 49% male.                                                                                                                                                                                                                                       | 1280                                    | Every 15 mins (day) and 30 mins (night)                | SD, ARV                       | 4.75 +/- 1.8 years (mean, range 0.2-7.5) | 57.0%                                   | CVD events                                                                               |
| Pringle, 2003[13] (Europe)     | Syst-Eur trial                    | Syst-Eur study. Elderly patients (60+) with isolated systolic hypertension. Median age 69.5. 39% male.                                                                                                                                                                                                                                                                     | 744                                     | Every 30 mins                                          | SD                            | 4.4 years (median)                       | 100% (384 on active treatment in trial) | Stroke events, CHD events and CVD mortality                                              |

| Paper, Year (Country)                                                 | Study                                                          | Population                                                                                                                                                                                                                                             | N    | Frequency of measurement                                                          | Measure of Variability                                               | Follow-up                         | Antihypertensive medication                                    | Outcome Measure              |
|-----------------------------------------------------------------------|----------------------------------------------------------------|--------------------------------------------------------------------------------------------------------------------------------------------------------------------------------------------------------------------------------------------------------|------|-----------------------------------------------------------------------------------|----------------------------------------------------------------------|-----------------------------------|----------------------------------------------------------------|------------------------------|
| Rothwell, 2010[14] (UK/Scandinavia)                                   | ASCOT-BPLA trial ABPM substudy (subset of stroke/TIA patients) | Patients with previous TIA or stroke                                                                                                                                                                                                                   | 1905 | Every 30 mins                                                                     | SD, CV, VIM                                                          | 5 years (median)                  | 100.0%                                                         | Stroke events                |
| Verdecchia, 2007[15] (Italy)                                          | PIUMA (observational)                                          | Initially untreated subjects with essential hypertension. Mean age = 51 yrs. Prevalence of women 47%                                                                                                                                                   | 2649 | Every 15 mins                                                                     | SD                                                                   | 6 years (mean, max 16 years)      | Untreated initially - subsequent antihypertensive use recorded | CVD events                   |
| <b>Long-term BP variability measured through clinic BP monitoring</b> |                                                                |                                                                                                                                                                                                                                                        |      |                                                                                   |                                                                      |                                   |                                                                |                              |
| Arashi, 2015[16] (Japan)                                              | HIJ-CREATE trial                                               | Participants of the Heart Institute of Japan Candesartan Randomised Trial for Evaluation in Coronary Artery Disease. Hospitalized patients with coronary artery disease and hypertension aged 20-80, June 2001 to April 2004. Mean age 48.5. 80% male. | 1734 | Every 6 months for a year, then every 12 months                                   | SD, CV, VIM                                                          | 4.2 years (median)                | 100% (trial of antihypertensives)                              | CVD events                   |
| Blacher, 2015[17] (France)                                            | SU.FOL.OM3 trial                                               | Participants from the SU.FOL.OM3 trial with experience of a coronary or cerebral ischemic acute event 1–12 months before inclusion. 45-80 years. Mean age 61. 80% male.                                                                                | 2157 | Baseline then annually for 5 years                                                | SD, CV                                                               | 4.2±1.0 years (mean, max 5 years) | Yes - between 5% on alpha blockers to 69% on beta blockers.    | CVD events                   |
| Carr, 2012[18] (UK)                                                   | MRC Elderly Trial                                              | Hypertensive patients with a mean systolic BP at 160-209mmHg and diastolic BP < 115mmHg at entry                                                                                                                                                       | 4396 | Fortnightly basis for first month then monthly basis for 3 months, then 3 monthly | SR and RSV (Root successive variance = SR divided by BP at baseline) | 5.8 years (mean)                  | 100% (trial of antihypertensives)                              | Stroke events and CHD events |



| <b>Paper, Year (Country)</b> | <b>Study</b>         | <b>Population</b>                                                                                                                                                                                                          | <b>N</b> | <b>Frequency of measurement</b>                       | <b>Measure of Variability</b>              | <b>Follow-up</b>    | <b>Antihypertensive medication</b>               | <b>Outcome Measure</b>                                                      |
|------------------------------|----------------------|----------------------------------------------------------------------------------------------------------------------------------------------------------------------------------------------------------------------------|----------|-------------------------------------------------------|--------------------------------------------|---------------------|--------------------------------------------------|-----------------------------------------------------------------------------|
| Eguchi, 2012[2] (Japan)      | Observational        | Asymptomatic patients aged 33-88 attending general internal medicine clinics at three institutes in Japan, for the evaluation and management of hypertension. Mean age 67. 38% male.                                       | 457      | Every month                                           | SD                                         | 66 months (mean)    | 55.6%                                            | Hard and all CVD events                                                     |
| Gao, 2014[19] (USA)          | Observational        | US Primary care patients aged 60+ years approached for a depression screening study 1991-1993. Mean age 68. 31% male.                                                                                                      | 2906     | At routine outpatient visits                          | RMSE (root mean squared error)             | 12.9 years (median) | 89.7%                                            | All-cause mortality, CHD events and stroke events                           |
| Hara, 2014[20] (Europe)      | Syst-Eur trial       | Patients aged 60+ with isolated systolic hypertension (SBP <160, DBP<95). Mean age 70. 33% male.                                                                                                                           | 4695     | Every 3 months                                        | SD, CV, VIM, ARV, MMD (min-max difference) | 2 years (median)    | 50% (randomised to active treatment)             | CVD events and mortality                                                    |
| Hata, 2013[21] (Worldwide)   | ADVANCE trial        | Patients aged 55+ with type 2 diabetes and history of major macro- or micro- vascular disease. Mean age 66. 58% male.                                                                                                      | 8811     | Months 3, 4 and 6 then every 6 months up to 24 months | SD, CV                                     | 2.4 years (median)  | 69% (at baseline but trial of antihypertensives) | All-cause mortality, CVD mortality, CVD events, stroke events and MI events |
| Hsieh, 2012[22] (Taiwan)     | Observational        | Patients with type 2 diabetes visiting the diabetic clinic in the Metabolism Division at Changhua Christian hospital Sept 2003-Apr 2005. Mean age 63.5. 43% male.                                                          | 2161     | Every 2-6 months                                      | SD, CV                                     | 66.7 months (mean)  | 80.0%                                            | All-cause and CVD mortality                                                 |
| Kawai, 2013[23] (Japan)      | NOAH (observational) | Non-Invasive Atherosclerotic Evaluation in Hypertension study. Outpatients diagnosed with essential hypertension recruited between January 1998 and June 2004 at Osaka University Medical Hospital. Mean age 62. 53% male. | 485      | Every 1-2 months (6 visits total)                     | SD                                         | 7.59 years (mean)   | 47.3%                                            | CVD events                                                                  |

| Paper, Year (Country)       | Study         | Population                                                                                                                                                                                                      | N    | Frequency of measurement                         | Measure of Variability                                                                                                                                    | Follow-up               | Antihypertensive medication                            | Outcome Measure                                                                             |
|-----------------------------|---------------|-----------------------------------------------------------------------------------------------------------------------------------------------------------------------------------------------------------------|------|--------------------------------------------------|-----------------------------------------------------------------------------------------------------------------------------------------------------------|-------------------------|--------------------------------------------------------|---------------------------------------------------------------------------------------------|
| Kostis, 2014[24] (USA)      | SHEP (trial)  | Systolic hypertension in the elderly program. Average age 72, 57% women and 15% black. USA.                                                                                                                     | 4736 | Baseline, months 1, 2 and 3, then every 3 months | VIM, rSSR (sum of squared deviations between average and trend predicted BP), VABS2 (variance of absolute difference between successive daily BP (VABS2)) | 17 years (max)          | 100.0%                                                 | CVD mortality                                                                               |
| Lau, 2014a[25] (China)      | Observational | Ischaemic stroke patients without atrial fibrillation, Hong Kong. Average age 71 years. 53% male.                                                                                                               | 632  | Every 3-4 months                                 | CV                                                                                                                                                        | 76+/- 18 months (mean)  | 80.0%                                                  | All-cause and CVD mortality, nonfatal recurrent stroke and nonfatal acute coronary syndrome |
| Lau, 2014b[26] (China)      | Observational | Patients with known history of coronary artery disease, ischaemic stroke or diabetes. Mean age 66. 68% male.                                                                                                    | 656  | Every 3-4 months                                 | SD                                                                                                                                                        | 81 +/- 12 months (mean) | Yes - from 8% on alpha-blockers to 51% on beta blocker | CVD events                                                                                  |
| Mallamaci, 2013[27] (Italy) | Observational | Italians aged 18-75 with CKD stages 3 and 4, recruited in renal clinics from Oct 2005 to Nov 2007. Mean age 64. 59% male.                                                                                       | 1618 | Two visits per year for 3 years                  | SD, CV                                                                                                                                                    | 37 months (median)      | 94.0%                                                  | All-cause mortality and CVD events                                                          |
| Mancia, 2012[28] (Europe)   | ELSA trial    | European Lacidipine Study on Atherosclerosis which randomized antihypertensive treatment for 4 years to mildly or moderately hypertensive patients at relatively low cardiovascular risk Mean age 56. 56% male. | 1521 | Every 6 months                                   | SD, CV                                                                                                                                                    | 4 years (max)           | Yes (trial of antihypertensives)                       | CVD events                                                                                  |

| Paper, Year (Country)                      | Study                                            | Population                                                                                                                                                                                                                                                                                                          | N                                                      | Frequency of measurement                                      | Measure of Variability | Follow-up                                                                     | Antihypertensive medication                               | Outcome Measure                                                           |
|--------------------------------------------|--------------------------------------------------|---------------------------------------------------------------------------------------------------------------------------------------------------------------------------------------------------------------------------------------------------------------------------------------------------------------------|--------------------------------------------------------|---------------------------------------------------------------|------------------------|-------------------------------------------------------------------------------|-----------------------------------------------------------|---------------------------------------------------------------------------|
| McMullan, 2013[29] (USA)                   | AASK (trial)                                     | African American Study of Kidney Disease. African Americans with hypertensive nephropathy. Mean age 55 years, 62% men.                                                                                                                                                                                              | 908                                                    | Months 4, 6, 8, 10 and 12                                     | SD                     | 52 months (median, max 75 months)                                             | Yes (trial of antihypertensives)                          | All-cause mortality, CVD mortality, CVD events                            |
| Muntner, 2015[30] (USA)                    | ALLHAT (trial)                                   | Participants from the Antihypertensive and Lipid Lowering Treatment to Prevent Heart Attack Trial. Mean age 66. 52% male.                                                                                                                                                                                           | 25,814                                                 | At 6, 9, 12, 16, 20, 24 and 28 months                         | SD, ARV, VIM           | 2.7 to 2.9 years (mean: outcome dependent, 5.7 years max)                     | 100% (trial of antihypertensives)                         | Fatal CHD or non-fatal MI, all-cause mortality, stroke and heart failure. |
| Poortvliet, 2012[31] (Ireland/Netherlands) | PROSPER trial                                    | Men and women aged 70-82 years in Scotland, Ireland and the Netherlands with either pre-existing vascular disease (coronary, cerebral, or peripheral) or at high risk due to smoking, hypertension or diabetes. Long-term follow-up: mean age 75, 48.5% male..                                                      | 4819 (short-term follow-up) 1808 (long-term follow-up) | Every 3 months                                                | SD, CV                 | 2.3 years (mean, max 3 years, Scottish subgroup: max of 9.3 years (mean 7.1)) | 62.6% (short term follow up), 59.6% (long term follow up) | All-cause mortality, CVD mortality, stroke events, CHD events             |
| Rakugi, 2015[32] (Japan)                   | COLM trial[33]                                   | Participants in the Combination of OLMesartan and a calcium channel blocker (CCB) or a diuretic in Japanese elderly hypertensive patients (COLM) trial. Hypertensive patients ages 65–84 years with a history of cardiovascular disease and/or cardiovascular risk factors and hypertensive. Mean age 74. 51% male. | 4876                                                   | At , 3 and 6 months, then every 6 months to at least 3 years  | SD, VIM, ARV           | 3.3. years (median)                                                           | 100% (trial of antihypertensives)                         | CVD events                                                                |
| Rossignol, 2015[34] (Worldwide)            | HEAAL trial                                      | Patients from the Heart failure Endpoint evaluation of Angiotensin II Antagonist Loasrtan (HEAAL) study - patients with HF classes II-IV, LVEF<40% or intolerance to ACEi. Mean age 64. 70% male.                                                                                                                   | 3732                                                   | Three times in the first year then semi-annually              | SD, CV, ARV            | 6.8 years                                                                     | 100% (trial of antihypertensives)                         | All-cause mortality or hospitalisation for worsening heart failure        |
| Rothwell, 2010[14] (UK/Scandinavia)        | ASCOT-BPLA trial (subset of stroke/TIA patients) | Patients with previous TIA or stroke                                                                                                                                                                                                                                                                                | 2011                                                   | At baseline, 6 weeks, 3 months, 6 months, then every 6 months | SD, CV, VIM            | 5 years (median)                                                              | 100% (trial of antihypertensives)                         | Stroke events                                                             |

| Paper, Year (Country)                                              | Study                                               | Population                                                                                                                                                                                                                                           | N       | Frequency of measurement      | Measure of Variability | Follow-up                            | Antihypertensive medication | Outcome Measure                                  |
|--------------------------------------------------------------------|-----------------------------------------------------|------------------------------------------------------------------------------------------------------------------------------------------------------------------------------------------------------------------------------------------------------|---------|-------------------------------|------------------------|--------------------------------------|-----------------------------|--------------------------------------------------|
| Rothwell, 2010[14] (Netherlands)                                   | Dutch-TIA trial[35] (subset of stroke/TIA patients) | Patients with recent TIA or stroke                                                                                                                                                                                                                   | 3150    | Every 4 months for 2.6 years  | SD, CV, VIM            | 2.6 years. (mean)                    | 42.0%                       | Stroke events                                    |
| Rothwell, 2010[14] (Europe)                                        | ESPS-1 trial[36] (subset of stroke/TIA patients)    | Patients with recent cerebrovascular event                                                                                                                                                                                                           | 2500    | Every 3 months for 2 years    | SD, CV, VIM            | 2 years (max)                        | Not stated                  | Stroke events                                    |
| Rothwell, 2010[14] (UK)                                            | UK-TIA trial[37] (subset of stroke/TIA patients)    | Patients with history of TIA, mean age 60.3 years.                                                                                                                                                                                                   | 2006    | Every 4 months for 2.6 years  | SD, CV, VIM            | 3.3 years (median, max 6.67 years)   | 27.0%                       | Stroke events                                    |
| Shimbo, 2012[38] (USA)                                             | Women's health initiative (observational)           | Post-menopausal patients enrolled in the women's health initiative.                                                                                                                                                                                  | 58228   | Annually. (Mean visits = 7.9) | SD                     | 5.4 years (median)                   | Not stated                  | Stroke events                                    |
| Suchy-Dicey, 2013[39] (USA)                                        | Cardiovascular health study (observational)         | Subjects who either used no antihypertensives during a 5 year baseline period or who used the same anti-hypertensive regimen during that period. Mean age 71 yrs. 95% white                                                                          | 2548    | 5 annual clinic visits        | SD                     | 9.9 years (mean)                     | 38.4%                       | All-cause mortality, MI events and stroke events |
| Wei, 2013[40] (China)                                              | PROBE trial                                         | Hypertensive Chinese patients aged 70+. Mean age 77. 66% male.                                                                                                                                                                                       | 724     | Every 6 months                | SD                     | 4 years (mean)                       | 100.0%                      | CVD events                                       |
| Yu, 2014[41] (China)                                               | Observational                                       | Hypertensive patients with records in an electronic database for Shanghai, China, Jan 2005 - July 2011. Aged 18+, without history of stroke, and with at least 6 database BP readings on average no more than 6 months apart. Mean age 64. 46% male. | 122,636 | Every 6 months                | SD, CV                 | 48 months (mean, range 36-60 months) | Not stated                  | Stroke events                                    |
| <b>Mid-term BP variability measured through home BP monitoring</b> |                                                     |                                                                                                                                                                                                                                                      |         |                               |                        |                                      |                             |                                                  |

| <b>Paper, Year (Country)</b>     | <b>Study</b>                         | <b>Population</b>                                                                                        | <b>N</b> | <b>Frequency of measurement</b>                            | <b>Measure of Variability</b>      | <b>Follow-up</b>    | <b>Antihypertensive medication</b> | <b>Outcome Measure</b>                                                                               |
|----------------------------------|--------------------------------------|----------------------------------------------------------------------------------------------------------|----------|------------------------------------------------------------|------------------------------------|---------------------|------------------------------------|------------------------------------------------------------------------------------------------------|
| Asayama, 2013[42]<br>(Japan)     | Ohasama<br>(observational)           | >35 years old, at home during working hours, not hospitalised, not incapacitated. Mean age 59. 39% male. | 2421     | Every morning and evening for 28 days                      | VIM, ARV, MMD (min-max difference) | 12 years (median)   | 27.1%                              | All-cause mortality, CVD mortality and stroke events                                                 |
| Hashimoto, 2012[43]<br>(Japan)   | Ohasama<br>(observational)           | Japanese Men. Mean age 58.6 years. 100% men.                                                             | 902      | 28 morning readings over 28 days                           | SD                                 | 13.1 years (median) | 26.1%                              | All-cause mortality, CVD mortality, stroke mortality, MI mortality, stroke events                    |
| Johanssen, 2012[44]<br>(Finland) | Health 2000 study<br>(observational) | Finnish adults aged 45-74 years. Mean age 56. 44% male.                                                  | 1866     | 7 consecutive days - 2 in the morning and 2 in the evening | SD, ARV                            | 7.8 years (mean)    | 30.6%                              | CVD events and all-cause mortality                                                                   |
| Kikuya, 2008[45]<br>(Japan)      | Ohasama<br>(observational)           | Japanese. Baseline age 35-96 years (mean age = 59.3 +/- 12.3 years). 60.5% women                         | 2455     | One reading every day for 4 weeks                          | SD                                 | 11.9 years (median) | 72.6%                              | All-cause mortality, CVD mortality, Non-CVD mortality, stroke mortality, CHD mortality, MI mortality |

## Study references

- 1 Bjorkland K, Lind L, Berglund L, *et al.* Prognostic significance of 24-h ambulatory blood pressure characteristics for cardiovascular morbidity in a population of elderly men. *J Hypertens* 2004;**22**:1691–7.
- 2 Eguchi K, Hoshida S, Schwartz JE, *et al.* Visit-to-visit and ambulatory blood pressure variability as predictors of incident cardiovascular events in patients with hypertension. *Am J Hypertens* 2012;**25**:962–8.
- 3 Gavish B, Ben-Dov IZ, Kark JD, *et al.* The association of a simple blood pressure-independent parameter derived from ambulatory blood pressure variability with short-term mortality. *Hypertens Res* 2009;**32**:488–95. doi:10.1038/hr.2009.39
- 4 Gavish B, Bursztyn M. Blood pressure and heart period variability ratios derived from 24-h ambulatory measurements are predictors of all-cause mortality. *J Hypertens* 2015;**33**:491–8. doi:10.1097/HJH.0000000000000459
- 5 Hansen TW, Thijs L, Li Y, *et al.* Prognostic value of reading-to-reading blood pressure variability over 24 hours in 8938 subjects from 11 populations. *Hypertension* 2010;**55**:1049–57. doi:10.1161/HYPERTENSIONAHA.109.140798
- 6 Kikuya M, Hozawa a., Ohokubo T, *et al.* Prognostic Significance of Blood Pressure and Heart Rate Variabilities : The Ohasama Study. *Hypertension* 2000;**36**:901–6. doi:10.1161/01.HYP.36.5.901
- 7 Mancia G, Bombelli M, Facchetti R, *et al.* Long-term prognostic value of blood pressure variability in the general population: results of the Pressioni Arteriose Monitorate e Loro Associazioni Study. *Hypertension* 2007;**49**:1265–70. doi:10.1161/HYPERTENSIONAHA.107.088708
- 8 Mena LJ, Maestre GE, Hansen TW, *et al.* How many measurements are needed to estimate blood pressure variability without loss of prognostic information? *Am J Hypertens* 2014;**27**:46–55. doi:10.1093/ajh/hpt142
- 9 Palatini P, Reboldi G, Beilin LJ, *et al.* Added predictive value of night-time blood pressure variability for cardiovascular events and mortality: the Ambulatory Blood Pressure-International Study. *Hypertension* 2014;**64**:487–93. doi:10.1161/HYPERTENSIONAHA.114.03694

- 10 Pierdomenico SD, Lapenna D, Bucci A, *et al.* Blood pressure variability and prognosis in uncomplicated mild hypertension. *Am Heart J* 2005;**149**:934–8. doi:10.1016/j.ahj.2004.06.029
- 11 Pierdomenico SD, Lapenna D, Di Tommaso R, *et al.* Blood pressure variability and cardiovascular risk in treated hypertensive patients. *Am J Hypertens* 2006;**19**:991–7.
- 12 Pierdomenico SD, Di Nicola M, Esposito AL, *et al.* Prognostic value of different indices of blood pressure variability in hypertensive patients. *Am J Hypertens* 2009;**22**:842–7. doi:10.1038/ajh.2009.103
- 13 Pringle E, Phillips C, Thijs L, *et al.* Systolic blood pressure variability as a risk factor for stroke and cardiovascular mortality in the elderly hypertensive population. *J Hypertens* 2003;**21**:2251–7.
- 14 Rothwell PM, Howard SC, Dolan E, *et al.* Prognostic significance of visit-to-visit variability, maximum systolic blood pressure, and episodic hypertension. *Lancet* 2010;**375**:895–905. doi:10.1016/S0140-6736(10)60308-X
- 15 Verdecchia P, Angeli F, Gattobigio R, *et al.* Impact of blood pressure variability on cardiac and cerebrovascular complications in hypertension. *Am J Hypertens* 2007;**20**:154–61. doi:10.1016/j.amjhyper.2006.07.017
- 16 Arashi H, Ogawa H, Yamaguchi JI, *et al.* Impact of Visit-to-Visit Variability and Systolic Blood Pressure Control on Subsequent Outcomes in Hypertensive Patients With Coronary Artery Disease (from the HIJ-CREATE Substudy). *Am J Cardiol* 2015;**116**:236–42. doi:10.1016/j.amjcard.2015.04.011
- 17 Blacher J, Safar ME, Ly C, *et al.* Blood pressure variability: cardiovascular risk integrator or independent risk factor? *J Hum Hypertens* 2015;**29**:122–6. doi:10.1038/jhh.2014.44
- 18 Carr MJ, Bao Y, Pan J, *et al.* The predictive ability of blood pressure in elderly trial patients. *J Hypertens* 2012;**30**:1725–33.
- 19 Gao S, Hendrie HC, Wang C, *et al.* Redefined blood pressure variability measure and its association with mortality in elderly primary care patients. *Hypertension* 2014;**64**:45–52. doi:10.1161/HYPERTENSIONAHA.114.03576
- 20 Hara A, Thijs L, Asayama K, *et al.* Randomised double-blind comparison of placebo and active drugs for effects on risks associated with blood pressure variability in the Systolic Hypertension in Europe trial. *PLoS One* 2014;**9**:e103169. doi:10.1371/journal.pone.0103169

- 21 Hata J, Arima H, Rothwell PM, *et al.* Effects of visit-to-visit variability in systolic blood pressure on macrovascular and microvascular complications in patients with type 2 diabetes mellitus: The advance trial. *Circulation* 2013;**128**:1325–34. doi:10.1161/CIRCULATIONAHA.113.002717
- 22 Hsieh Y-T, Tu S-T, Cho T-J, *et al.* Visit-to-visit variability in blood pressure strongly predicts all-cause mortality in patients with type 2 diabetes: A 5·5-year prospective analysis. *Eur J Clin Invest* 2012;**42**:245–53.
- 23 Kawai T, Ohishi M, Ito N, *et al.* Alteration of vascular function is an important factor in the correlation between visit-to-visit blood pressure variability and cardiovascular disease. *J Hypertens* 2013;**31**:1387–95; discussion 1395. doi:10.1097/HJH.0b013e328360f796
- 24 Kostis JB, Sedjro JE, Cabrera J, *et al.* Visit-to-visit blood pressure variability and cardiovascular death in the Systolic Hypertension in the Elderly Program. *J Clin Hypertens (Greenwich)* 2014;**16**:34–40. doi:10.1111/jch.12230
- 25 Lau K-K, Wong Y-K, Teo K-C, *et al.* Long-term prognostic implications of visit-to-visit blood pressure variability in patients with ischemic stroke. *Am J Hypertens* 2014;**27**:1486–94. doi:10.1093/ajh/hpu070
- 26 Lau KK, Wong YK, Chan YH, *et al.* Visit-to-visit blood pressure variability as a prognostic marker in patients with cardiovascular and cerebrovascular diseases - Relationships and comparisons with vascular markers of atherosclerosis. *Atherosclerosis* 2014;**235**:230–5. doi:10.1016/j.atherosclerosis.2014.04.015
- 27 Mallamaci F, Minutolo R, Leonardi D, *et al.* Long-term visit-to-visit office blood pressure variability increases the risk of adverse cardiovascular outcomes in patients with chronic kidney disease. *Kidney Int* 2013;**84**:381–9. doi:10.1038/ki.2013.132
- 28 Mancia G, Facchetti R, Parati G, *et al.* Visit-to-visit blood pressure variability in the European Lacidipine Study on Atherosclerosis: Methodological aspects and effects of antihypertensive treatment. *J Hypertens* 2012;**30**:1241–51.
- 29 McMullan CJ, Bakris GL, Phillips R a, *et al.* Association of BP variability with mortality among African Americans with CKD. *Clin J Am Soc Nephrol* 2013;**8**:731–8. doi:10.2215/CJN.10131012
- 30 Muntner P, Whittle J, Lynch AI, *et al.* Visit-to-Visit Variability of Blood Pressure and Coronary Heart Disease, Stroke, Heart Failure, and Mortality. *Ann Intern Med* 2015;**163**:329. doi:10.7326/M14-2803



- 31 Poortvliet RKE, Ford I, Lloyd SM, *et al.* Blood Pressure Variability and Cardiovascular Risk in the PROspective Study of Pravastatin in the Elderly at Risk (PROSPER). *PLoS One* 2012;**7**.
- 32 Rakugi H, Ogihara T, Saruta T, *et al.* Preferable effects of olmesartan/calcium channel blocker to olmesartan/diuretic on blood pressure variability in very elderly hypertension. *J Hypertens* 2015;**33**:2165–72. doi:10.1097/HJH.0000000000000668
- 33 Ogihara T, Saruta T, Rakugi H, *et al.* Rationale, study design and implementation of the COLM study: the combination of OLMesartan and calcium channel blocker or diuretic in high-risk elderly hypertensive patients. *Hypertens Res* 2009;**32**:163–7. doi:10.1038/hr.2008.31
- 34 Rossignol P, Girerd N, Gregory D, *et al.* Increased visit-to-visit blood pressure variability is associated with worse cardiovascular outcomes in low ejection fraction heart failure patients: Insights from the HEAAL study. *Int J Cardiol* 2015;**187**:183–9. doi:10.1016/j.ijcard.2015.03.169
- 35 Dutch TIA Trial Study Group. A comparison of two doses of aspirin (30 mg vs. 283 mg a day) in patients after a transient ischemic attack or minor ischemic stroke. The Dutch TIA Trial Study Group. *N Engl J Med* 1991;**325**:1261–6. doi:10.1056/NEJM199110313251801
- 36 THE ESPS Group. THE EUROPEAN STROKE PREVENTION STUDY (ESPS). *Lancet* 1987;**330**:1351–4. doi:10.1016/S0140-6736(87)91254-2
- 37 Farrell B, Godwin J, Richards S, *et al.* The United Kingdom transient ischaemic attack (UK-TIA) aspirin trial: final results. *J Neurol Neurosurg Psychiatry* 1991;**54**:1044–54.
- 38 Shimbo D, Newman JD, Aragaki AK, *et al.* Association between annual visit-to-visit blood pressure variability and stroke in postmenopausal women: Data from the Women’s health initiative. *Hypertension* 2012;**60**:625–30.
- 39 Suchy-Dicey AM, Wallace ER, Mitchell SVE, *et al.* Blood pressure variability and the risk of all-cause mortality, incident myocardial infarction, and incident stroke in the cardiovascular health study. *Am J Hypertens* 2013;**26**:1210–7. doi:10.1093/ajh/hpt092
- 40 Wei Y, Jin Z, Shen G, *et al.* Effects of intensive antihypertensive treatment on Chinese hypertensive patients older than 70 years. *J Clin Hypertens (Greenwich)* 2013;**15**:420–7. doi:10.1111/jch.12094

- 41 Yu J, Kong Q, Schoenhagen P, *et al.* The prognostic value of long-term visit-to-visit blood pressure variability on stroke in real-world practice: A dynamic cohort study in a large representative sample of Chinese hypertensive population. *Int J Cardiol* 2014;**177**:995–1000. doi:10.1016/j.ijcard.2014.09.149
- 42 Asayama K, Kikuya M, Schutte R, *et al.* Home blood pressure variability as cardiovascular risk factor in the population of ohasama. *Hypertension* 2013;**61**:61–9. doi:10.1161/HYPERTENSIONAHA.111.00138
- 43 Hashimoto T, Kikuya M, Ohkubo T, *et al.* Home blood pressure level, blood pressure variability, smoking, and stroke risk in Japanese men: the Ohasama study. *Am J Hypertens* 2012;**25**:883–91.
- 44 Johansson JK, Niiranen TJ, Puukka PJ, *et al.* Prognostic value of the variability in home-measured blood pressure and heart rate: the Finn-Home Study. *Hypertension* 2012;**59**:212–8. doi:10.1161/HYPERTENSIONAHA.111.178657
- 45 Kikuya M, Ohkubo T, Metoki H, *et al.* Day-by-day variability of blood pressure and heart rate at home as a novel predictor of prognosis: the Ohasama study. *Hypertension* 2008;**52**:1045–50.

**Table e5: Study and analysis characteristics that may confound the relationship between blood pressure variability and outcomes**

| Paper, Year                                                                       | Study design characteristics |                        |                        |                             | Potential confounders                                |                                             |                                       |                                                     |                                            |                              |                                          |                                                  |
|-----------------------------------------------------------------------------------|------------------------------|------------------------|------------------------|-----------------------------|------------------------------------------------------|---------------------------------------------|---------------------------------------|-----------------------------------------------------|--------------------------------------------|------------------------------|------------------------------------------|--------------------------------------------------|
|                                                                                   | Appropriate cuff size used   | Consistent reading arm | Consistent device used | Same person taking readings | Appropriate adjustment for mean BP                   | Regression to mean considered (if relevant) | Diurnal/seasonal variation considered | Medication change during measurement period limited | Medication change during follow-up limited | Measurement before follow-up | Definition of a single measurement given | Main analysis (yes or reason for exclusion)      |
| <b>Short-term BP variability measured through ambulatory BP monitoring (ABPM)</b> |                              |                        |                        |                             |                                                      |                                             |                                       |                                                     |                                            |                              |                                          |                                                  |
| Bjorklund, 2004                                                                   | Unclear                      | Yes                    | Mercury sphyg          | Yes (ABPM)                  | No                                                   | Not relevant                                | Yes                                   | No but ABPM                                         | No                                         | Yes (ABPM)                   | Yes                                      | No adjustment for mean BP                        |
| Eguchi, 2012: ABPM analyses                                                       | Unclear                      | Unclear                | Yes                    | Yes (ABPM)                  | No –adjusted for clinic mean                         | Not relevant                                | No                                    | No but ABPM                                         | No                                         | Yes (ABPM)                   | Yes                                      | ABPM analyses adjusted for clinic mean           |
| Gavish, 2009                                                                      | Yes                          | Yes                    | No                     | Yes (ABPM)                  | No -adjusted for mean arterial pressure              | No                                          | No                                    | No but ABPM                                         | No                                         | Yes (ABPM)                   | Yes                                      | Incorrect adjustment for mean BP                 |
| Gavish, 2015                                                                      | Yes                          | Yes                    | No                     | Yes                         | Yes                                                  | Not relevant                                | No                                    | No but ABPM                                         | No                                         | Yes (ABPM)                   | Yes                                      | Yes                                              |
| Hansen, 2010                                                                      | Unclear                      | Unclear                | Unclear                | Yes (ABPM)                  | Yes                                                  | Not relevant                                | Yes                                   | No but ABPM                                         | No                                         | Yes (ABPM)                   | Yes                                      | Yes                                              |
| Kikuya, 2000                                                                      | Unclear                      | Unclear                | Yes                    | Yes (ABPM)                  | No -adjusted for 24-hour BP in day/night analysis    | Not relevant                                | Yes                                   | No but ABPM                                         | No                                         | Yes (ABPM)                   | Yes                                      | Adjusted for 24-hour BP in day/night analysis    |
| Mancia, 2007                                                                      | Unclear                      | Unclear                | Yes                    | Yes (ABPM)                  | No - adjusted for 24-hour mean in day/night analysis | Not relevant                                | Yes                                   | No but ABPM                                         | No                                         | Yes (ABPM)                   | Yes                                      | Adjusted for 24-hour mean in day/ night analysis |
| Mena, 2014                                                                        | Yes                          | Unclear                | Unclear                | Yes (ABPM)                  | Yes                                                  | Not relevant                                | No                                    | No but ABPM                                         | No                                         | Yes                          | Yes                                      | Yes                                              |
| Palatini, 2014                                                                    | Unclear                      | Unclear                | Unclear                | Yes (ABPM)                  | Yes                                                  | Not relevant                                | Yes                                   | Yes - untreated patients                            | No                                         | Yes (ABPM)                   | Yes                                      | Yes                                              |

| Paper, Year                                                           | Study design characteristics |                        |                        |                             | Potential confounders                              |                                             |                                       |                                                     |                                            |                              |                                          |                                             |
|-----------------------------------------------------------------------|------------------------------|------------------------|------------------------|-----------------------------|----------------------------------------------------|---------------------------------------------|---------------------------------------|-----------------------------------------------------|--------------------------------------------|------------------------------|------------------------------------------|---------------------------------------------|
|                                                                       | Appropriate cuff size used   | Consistent reading arm | Consistent device used | Same person taking readings | Appropriate adjustment for mean BP                 | Regression to mean considered (if relevant) | Diurnal/seasonal variation considered | Medication change during measurement period limited | Medication change during follow-up limited | Measurement before follow-up | Definition of a single measurement given | Main analysis (yes or reason for exclusion) |
| Pierdomenico, 2005                                                    | Unclear                      | Unclear                | Yes                    | Yes (ABPM)                  | Yes                                                | Not relevant                                | No                                    | No but ABPM                                         | No                                         | Yes (ABPM)                   | Yes                                      | No extractable data                         |
| Pierdomenico, 2006                                                    | Yes                          | Unclear                | Yes                    | Yes (ABPM)                  | Yes                                                | Not relevant                                | Yes                                   | No but ABPM                                         | No                                         | Yes (ABPM)                   | Yes                                      | Yes                                         |
| Pierdomenico, 2009                                                    | Yes                          | Unclear                | Yes                    | Yes (ABPM)                  | Yes                                                | Not relevant                                | Yes                                   | No but ABPM                                         | No                                         | Yes (ABPM)                   | Yes                                      | Yes                                         |
| Pringle, 2003                                                         | Yes                          | Yes                    | No                     | Yes (ABPM)                  | Yes                                                | Not relevant                                | Yes                                   | No but ABPM                                         | No                                         | Yes (ABPM)                   | Yes                                      | Yes                                         |
| Rothwell, 2010: ASCOT-BPLA ABPM substudy                              | Unclear                      | Unclear                | Yes                    | Yes (ABPM)                  | Unclear                                            | No                                          | Yes                                   | Yes (ABPM)                                          | No                                         | Yes (ABPM)                   | Yes                                      | Adjustment for mean unclear                 |
| Verdecchia, 2007                                                      | Unclear                      | Unclear                | No                     | Yes (ABPM)                  | Yes                                                | Not relevant                                | Yes                                   | No but ABPM                                         | No                                         | Yes (ABPM)                   | Yes                                      | Yes                                         |
| <b>Long-term BP variability measured through clinic BP monitoring</b> |                              |                        |                        |                             |                                                    |                                             |                                       |                                                     |                                            |                              |                                          |                                             |
| Arashi, 2015                                                          | Unclear                      | Unclear                | Mercury sphyg          | Unclear                     | No - diastolic analysis adjusted for systolic mean | Yes                                         | No                                    | No                                                  | No                                         | No                           | Unclear                                  | Follow-up and measurement confounded        |
| Blacher, 2015                                                         | Unclear                      | Unclear                | Yes                    | Unclear                     | Yes                                                | Not relevant                                | No                                    | No                                                  | No                                         | Unclear                      | Yes                                      | Follow-up and measurement confounded        |
| Carr, 2012                                                            | Unclear                      | Unclear                | Yes                    | No                          | Yes                                                | Yes                                         | Yes                                   | No                                                  | No                                         | No                           | Yes                                      | Treatment adherence low                     |
| Eguchi, 2012: clinic analyses                                         | Unclear                      | Unclear                | Mercury sphyg          | Unclear                     | Yes                                                | Not relevant                                | No                                    | No                                                  | No                                         | Unclear                      | Yes                                      | Measurement and follow-up confounded        |
| Gao, 2014                                                             | Unclear                      | Unclear                | Unclear                | Unclear                     | Yes                                                | Not relevant                                | No                                    | No                                                  | No                                         | No                           | Unclear                                  | Follow-up and measurement confounded        |

| Paper, Year      | Study design characteristics |                        |                        |                             | Potential confounders              |                                             |                                       |                                                               |                                            |                              |                                          |                                             |
|------------------|------------------------------|------------------------|------------------------|-----------------------------|------------------------------------|---------------------------------------------|---------------------------------------|---------------------------------------------------------------|--------------------------------------------|------------------------------|------------------------------------------|---------------------------------------------|
|                  | Appropriate cuff size used   | Consistent reading arm | Consistent device used | Same person taking readings | Appropriate adjustment for mean BP | Regression to mean considered (if relevant) | Diurnal/seasonal variation considered | Medication change during measurement period limited           | Medication change during follow-up limited | Measurement before follow-up | Definition of a single measurement given | Main analysis (yes or reason for exclusion) |
| Hara, 2014       | Yes                          | Yes                    | Mercury sphyg          | Unclear                     | Yes                                | Yes                                         | No                                    | No but adjusted for in secondary analysis                     | Yes                                        | No                           | Yes                                      | Follow-up and measurement confounded        |
| Hata, 2013       | Unclear                      | Unclear                | Yes                    | Unclear                     | Yes                                | Not relevant                                | No                                    | No but results similar in those who did not change            | No                                         | Yes                          | Yes                                      | Yes                                         |
| Hsieh, 2012      | Yes                          | Unclear                | Yes                    | Unclear                     | Yes                                | Not relevant                                | No                                    | No                                                            | No                                         | Unclear                      | Yes                                      | No extractable data                         |
| Kawai, 2013      | Unclear                      | Unclear                | No                     | Unclear                     | Yes                                | Not relevant                                | No                                    | Yes                                                           | No                                         | Unclear                      | Yes                                      | Follow-up and measurement confounded        |
| Kostis, 2014     | Unclear                      | Unclear                | Yes                    | Unclear                     | Yes                                | No                                          | No                                    | No but adherence high, results in cross-over patients similar | No                                         | No                           | Yes                                      | Yes                                         |
| Lau, 2014a       | Unclear                      | Unclear                | Yes                    | Unclear                     | Yes                                | Not relevant                                | No                                    | No but adjusted for medication use                            | No                                         | Unclear                      | Yes                                      | Follow-up and measurement confounded        |
| Lau, 2014b       | Unclear                      | Unclear                | Yes                    | Unclear                     | Yes                                | Not relevant                                | No                                    | No - only adjusted for baseline medication                    | No                                         | Unclear                      | Yes                                      | Follow-up and measurement confounded        |
| Mallamaci, 2013  | Yes                          | Yes                    | Mercury sphyg          | No                          | Yes                                | Not relevant                                | No                                    | No                                                            | No                                         | Unclear                      | Yes                                      | Follow-up and measurement confounded        |
| Mancia, 2012     | Unclear                      | Unclear                | Mercury sphyg          | Unclear                     | Yes                                | No                                          | No                                    | Yes                                                           | Yes                                        | No                           | Yes                                      | No extractable data                         |
| McMullan, 2013   | Unclear                      | Unclear                | Yes                    | Unclear                     | Yes                                | Not relevant                                | No                                    | No (adherence low)                                            | No                                         | Yes                          | Yes                                      | Medication adherence low                    |
| Muntner, 2015    | Unclear                      | Unclear                | Unclear                | Unclear                     | Yes                                | Yes                                         | No                                    | No but adjusted for medication use                            | No                                         | Yes                          | Yes                                      | Yes                                         |
| Poortvliet, 2012 | Unclear                      | Unclear                | Yes                    | Unclear                     | Yes                                | Not relevant                                | No                                    | No but trial of statins                                       | No                                         | Yes                          | Yes                                      | Yes                                         |

| Paper, Year                                                        | Study design characteristics |                        |                        |                             | Potential confounders              |                                             |                                       |                                                         |                                            |                              |                                          |                                             |
|--------------------------------------------------------------------|------------------------------|------------------------|------------------------|-----------------------------|------------------------------------|---------------------------------------------|---------------------------------------|---------------------------------------------------------|--------------------------------------------|------------------------------|------------------------------------------|---------------------------------------------|
|                                                                    | Appropriate cuff size used   | Consistent reading arm | Consistent device used | Same person taking readings | Appropriate adjustment for mean BP | Regression to mean considered (if relevant) | Diurnal/seasonal variation considered | Medication change during measurement period limited     | Medication change during follow-up limited | Measurement before follow-up | Definition of a single measurement given | Main analysis (yes or reason for exclusion) |
| Rakugi, 2015                                                       | Unclear                      | Unclear                | Unclear                | Unclear                     | Yes                                | No                                          | No                                    | Unclear (trial of antihypertensives, adherence unclear) | No                                         | No                           | Unclear                                  | Measurement and follow-up confounded        |
| Rossignol, 2015                                                    | Unclear                      | Yes                    | No                     | Unclear                     | No                                 | Not relevant                                | No                                    | Unclear (trial of antihypertensives, adherence unclear) | Unclear                                    | No                           | Unclear                                  | No extractable data for review outcomes     |
| Rothwell, 2010: ASCOT-BPLA                                         | Unclear                      | Unclear                | Yes                    | Unclear                     | Yes                                | No                                          | No                                    | No                                                      | No                                         | Unclear                      | Yes                                      | Follow-up and measurement confounded        |
| Rothwell, 2010: Dutch TIA                                          | Unclear                      | Unclear                | Mercury sphyg          | Unclear                     | Yes                                | Not relevant                                | No                                    | No                                                      | No                                         | Unclear                      | Yes                                      | Follow-up and measurement confounded        |
| Rothwell, 2010: ESPS-1                                             | Unclear                      | Yes                    | Mercury sphyg          | Unclear                     | Yes                                | Not relevant                                | No                                    | Analysis of placebo group only                          | Yes                                        | Unclear                      | Yes                                      | Follow-up and measurement confounded        |
| Rothwell, 2010: UK-TIA                                             | Unclear                      | Unclear                | Mercury sphyg          | Unclear                     | Yes                                | Not relevant                                | No                                    | RCT of aspirin only                                     | No                                         | Yes                          | Yes                                      | Yes                                         |
| Shimbo, 2012                                                       | Yes                          | Yes                    | Mercury sphyg          | Unclear                     | Yes                                | Not relevant                                | No                                    | No but medication adjusted for in analysis              | Yes                                        | Yes                          | Yes                                      | Yes                                         |
| Suchy-Dicey, 2013                                                  | Unclear                      | Yes                    | Mercury sphyg          | Unclear                     | Yes                                | Not relevant                                | No                                    | Yes (users of changing medication excluded)             | No                                         | Yes                          | Yes                                      | Yes                                         |
| Wei, 2013                                                          | Unclear                      | Yes                    | Manual sphyg           | Unclear                     | Yes                                | Not relevant                                | No                                    | No                                                      | No                                         | Unclear                      | Yes                                      | Follow-up and measurement confounded        |
| Yu, 2014                                                           | Yes                          | Yes                    | Mercury sphyg          | Unclear                     | Yes                                | No                                          | No                                    | No                                                      | No                                         | No                           | Yes                                      | Follow-up and measurement confounded        |
| <b>Mid-term BP variability measured through home BP monitoring</b> |                              |                        |                        |                             |                                    |                                             |                                       |                                                         |                                            |                              |                                          |                                             |

| Paper, Year     | Study design characteristics |                        |                        |                             | Potential confounders              |                                             |                                       |                                                     |                                            |                              |                                          |                                             |
|-----------------|------------------------------|------------------------|------------------------|-----------------------------|------------------------------------|---------------------------------------------|---------------------------------------|-----------------------------------------------------|--------------------------------------------|------------------------------|------------------------------------------|---------------------------------------------|
|                 | Appropriate cuff size used   | Consistent reading arm | Consistent device used | Same person taking readings | Appropriate adjustment for mean BP | Regression to mean considered (if relevant) | Diurnal/seasonal variation considered | Medication change during measurement period limited | Medication change during follow-up limited | Measurement before follow-up | Definition of a single measurement given | Main analysis (yes or reason for exclusion) |
| Asayama, 2013   | Unclear                      | Unclear                | Yes                    | Yes (home)                  | Yes                                | Not relevant                                | Yes                                   | Yes                                                 | No                                         | Yes (home)                   | Yes                                      | Yes                                         |
| Hashimoto, 2012 | Unclear                      | Unclear                | Yes                    | Yes (home)                  | Yes                                | Not relevant                                | No                                    | No but home                                         | No                                         | Yes (home)                   | Yes                                      | Yes                                         |
| Johanssen, 2012 | Unclear                      | Unclear                | Yes                    | Yes (home)                  | Yes                                | Not relevant                                | Yes                                   | No but home                                         | No                                         | Yes (home)                   | Yes                                      | Yes                                         |
| Kikuya, 2008    | Unclear                      | Unclear                | Yes                    | Yes (home)                  | Yes                                | No                                          | No                                    | No but adjusted for medication use                  | No                                         | Yes (home)                   | Yes                                      | Yes                                         |

**Table e6: Risk of bias assessment**

| Paper, Year                                                           | Study                                                             | Study Participation | Study Attrition | Prognostic Factor Measurement | Outcome Measurement | Study Confounding | Statistical Analysis and Reporting |
|-----------------------------------------------------------------------|-------------------------------------------------------------------|---------------------|-----------------|-------------------------------|---------------------|-------------------|------------------------------------|
| <b>Short-term BP variability measured through ABPM</b>                |                                                                   |                     |                 |                               |                     |                   |                                    |
| Bjorklund, 2004                                                       | ULSAM (observational)                                             | low                 | moderate        | low                           | low                 | moderate          | low                                |
| Eguchi, 2012                                                          | Observational (ABPM)                                              | moderate            | low             | low                           | low                 | moderate          | low                                |
| Gavish, 2009                                                          | Observational                                                     | moderate            | low             | moderate                      | low                 | moderate          | low                                |
| Gavish, 2015                                                          | Observational                                                     | moderate            | low             | moderate                      | low                 | low               | low                                |
| Hansen, 2010                                                          | IDACO (observational)                                             | moderate            | low             | low                           | low                 | low               | low                                |
| Kikuya, 2000                                                          | Ohasama (observational)                                           | moderate            | low             | low                           | low                 | moderate          | low                                |
| Mancia, 2007                                                          | PAMELA (observational)                                            | moderate            | low             | low                           | low                 | moderate          | low                                |
| Mena, 2014                                                            | IDACO (observational)                                             | moderate            | low             | low                           | low                 | low               | low                                |
| Palatini, 2014                                                        | ABP-International (observational)                                 | moderate            | low             | low                           | low                 | low               | low                                |
| Pierdomenico, 2005                                                    | Abruzzo, Italy (observational)                                    | moderate            | moderate        | low                           | moderate            | low               | high                               |
| Pierdomenico, 2006                                                    | Abruzzo, Italy (observational)                                    | moderate            | moderate        | low                           | moderate            | low               | low                                |
| Pierdomenico, 2009                                                    | Abruzzo, Italy (observational)                                    | moderate            | moderate        | low                           | moderate            | low               | low                                |
| Pringle, 2003                                                         | Syst-Eur trial                                                    | moderate            | low             | moderate                      | low                 | low               | low                                |
| Rothwell, 2010                                                        | ASCOT-BPLA trial ABPM substudy<br>(subset of stroke/TIA patients) | low                 | low             | low                           | low                 | moderate          | low                                |
| Verdecchia, 2007                                                      | PIUMA (observational)                                             | moderate            | low             | low                           | moderate            | low               | moderate                           |
| <b>Long-term BP variability measured through clinic BP monitoring</b> |                                                                   |                     |                 |                               |                     |                   |                                    |
| Arashi, 2015                                                          | HIJ-CREATE trial                                                  | moderate            | moderate        | moderate                      | high                | moderate          | low                                |
| Blacher, 2015                                                         | SU.FOL.OM3 trial                                                  | low                 | low             | low                           | high                | low               | high                               |
| Carr, 2012                                                            | MRC Elderly Trial                                                 | moderate            | moderate        | moderate                      | moderate            | low               | low                                |
| Eguchi, 2012                                                          | Observational (clinic)                                            | moderate            | low             | low                           | high                | low               | low                                |
| Gao, 2014                                                             | Observational                                                     | low                 | low             | moderate                      | high                | high              | low                                |
| Hara, 2014                                                            | Syst-Eur trial                                                    | moderate            | low             | low                           | high                | low               | low                                |
| Hata, 2013                                                            | ADVANCE trial                                                     | low                 | low             | low                           | low                 | low               | low                                |
| Hsieh, 2012                                                           | Observational                                                     | low                 | low             | low                           | high                | low               | low                                |
| Kawai, 2013                                                           | NOAH (observational)                                              | low                 | moderate        | moderate                      | moderate            | low               | low                                |
| Kostis, 2014                                                          | SHEP (trial)                                                      | moderate            | low             | moderate                      | low                 | low               | low                                |
| Lau, 2014a                                                            | Observational                                                     | low                 | high            | low                           | high                | low               | low                                |
| Lau, 2014b                                                            | Observational                                                     | low                 | low             | low                           | high                | low               | low                                |
| Mallamaci, 2013                                                       | Observational                                                     | moderate            | low             | moderate                      | high                | low               | low                                |



| Paper, Year                                                        | Study                                                  | Study Participation | Study Attrition | Prognostic Factor Measurement | Outcome Measurement | Study Confounding | Statistical Analysis and Reporting |
|--------------------------------------------------------------------|--------------------------------------------------------|---------------------|-----------------|-------------------------------|---------------------|-------------------|------------------------------------|
| Mancia, 2012                                                       | ELSA trial                                             | moderate            | low             | low                           | high                | low               | moderate                           |
| McMullan, 2013                                                     | AASK (trial)                                           | moderate            | low             | moderate                      | moderate            | low               | low                                |
| Muntner, 2015                                                      | ALLHAT (trial)                                         | low                 | low             | low                           | low                 | low               | low                                |
| Poortvliet, 2012                                                   | PROSPER trial                                          | low                 | low             | low                           | low                 | low               | low                                |
| Rakugi, 2015                                                       | COLM trial[33]                                         | low                 | low             | high                          | high                | low               | moderate                           |
| Rossignol, 2015                                                    | HEAAL trial                                            | moderate            | low             | high                          | high                | high              | moderate                           |
| Rothwell, 2010                                                     | ASCOT-BPLA trial<br>(subset of stroke/TIA patients)    | moderate            | low             | low                           | high                | low               | low                                |
| Rothwell, 2010                                                     | Dutch-TIA trial[35]<br>(subset of stroke/TIA patients) | low                 | low             | moderate                      | high                | low               | low                                |
| Rothwell, 2010                                                     | ESPS-1 trial[36]<br>(subset of stroke/TIA patients)    | low                 | low             | moderate                      | high                | low               | low                                |
| Rothwell, 2010                                                     | UK-TIA trial[37]<br>(subset of stroke/TIA patients)    | low                 | low             | moderate                      | low                 | low               | low                                |
| Shimbo, 2012                                                       | Women's health initiative (observational)              | low                 | moderate        | moderate                      | low                 | low               | low                                |
| Suchy-Dicey, 2013                                                  | Cardiovascular health study (observational)            | moderate            | low             | moderate                      | low                 | low               | low                                |
| Wei, 2013                                                          | PROBE trial                                            | low                 | moderate        | moderate                      | high                | moderate          | low                                |
| Yu, 2014                                                           | Observational                                          | low                 | moderate        | low                           | high                | low               | low                                |
| <b>Mid-term BP variability measured through home BP monitoring</b> |                                                        |                     |                 |                               |                     |                   |                                    |
| Asayama, 2013                                                      | Ohasama (observational)                                | moderate            | low             | low                           | low                 | low               | low                                |
| Hashimoto, 2012                                                    | Ohasama (observational)                                | moderate            | low             | low                           | low                 | low               | low                                |
| Johanssen, 2012                                                    | Health 2000 study (observational)                      | low                 | low             | low                           | low                 | low               | low                                |
| Kikuya, 2008                                                       | Ohasama (observational)                                | moderate            | moderate        | low                           | low                 | low               | low                                |

Supplementary data – long term variability in clinic BP

Figure e1

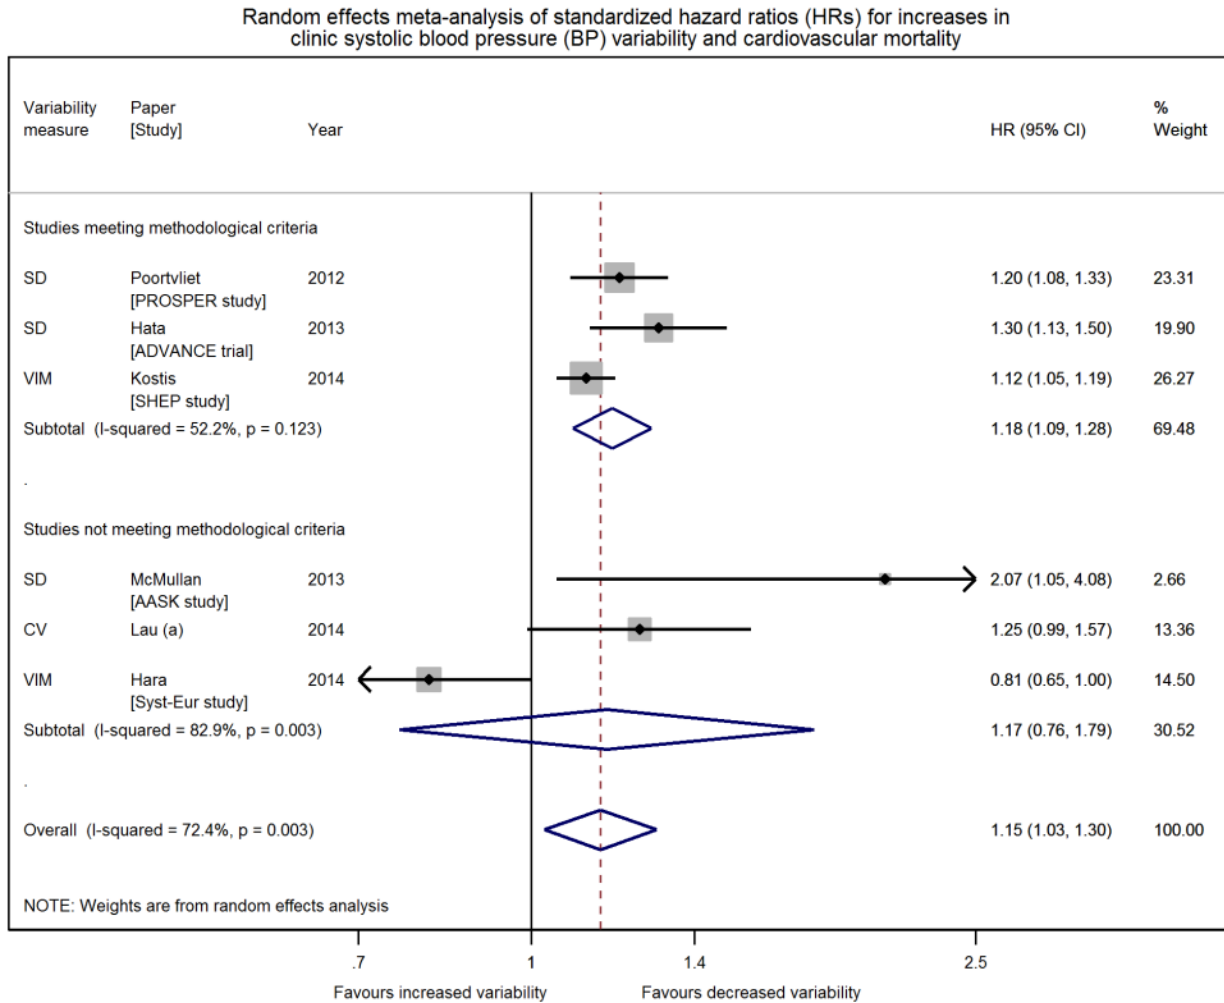

SD: Standard deviation, VIM: Variation independent of mean, CV: Coefficient of variation

Figure e2

Random effects meta-analysis of standardized hazard ratios (HRs) for increases in clinic systolic blood pressure (BP) variability and cardiovascular events

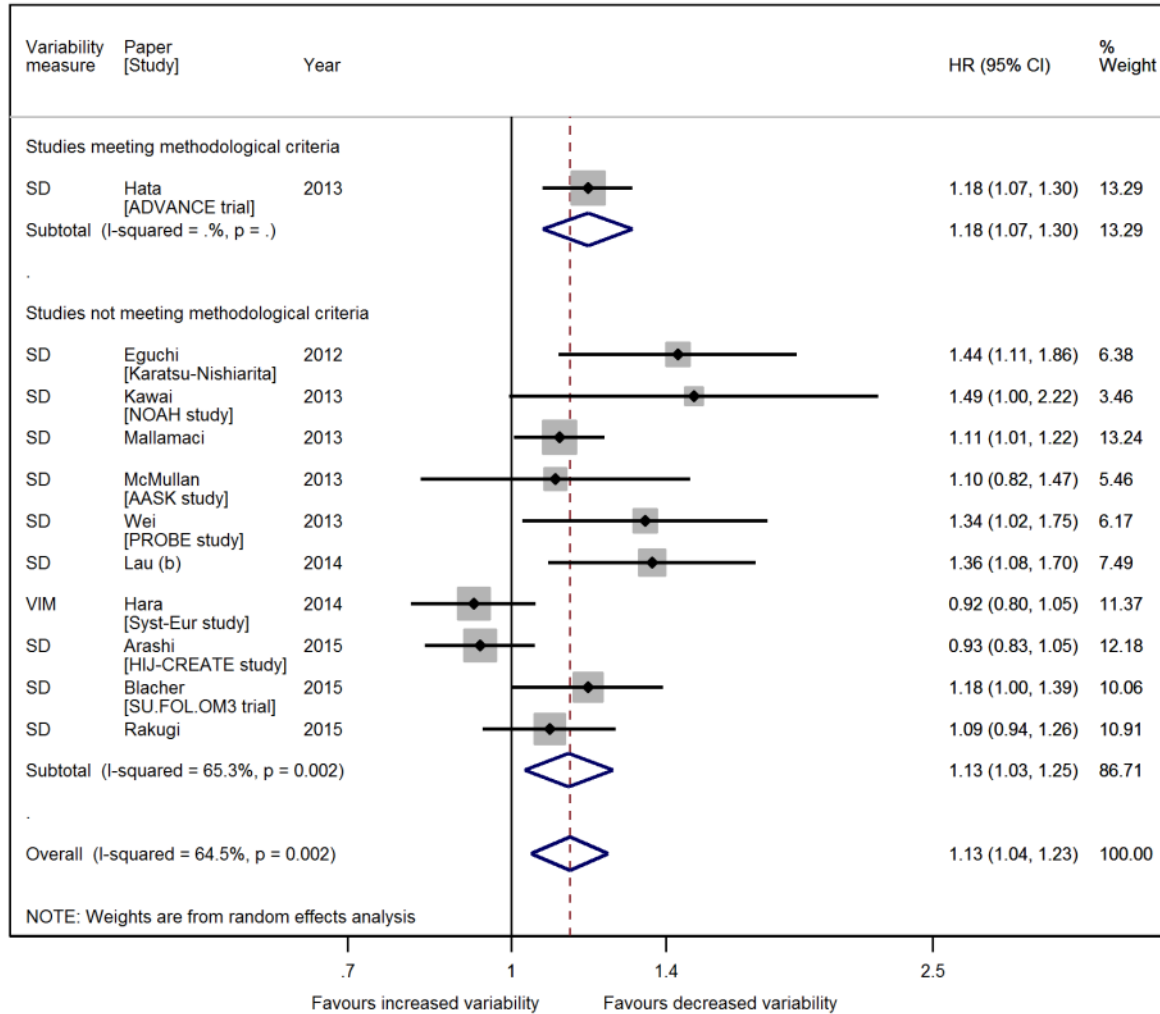

SD: Standard deviation, VIM: Variation independent of mean

**Figure e3**

Random effects meta-analysis of standardized hazard ratios (HRs) for increases in clinic systolic blood pressure (BP) variability and coronary heart disease events

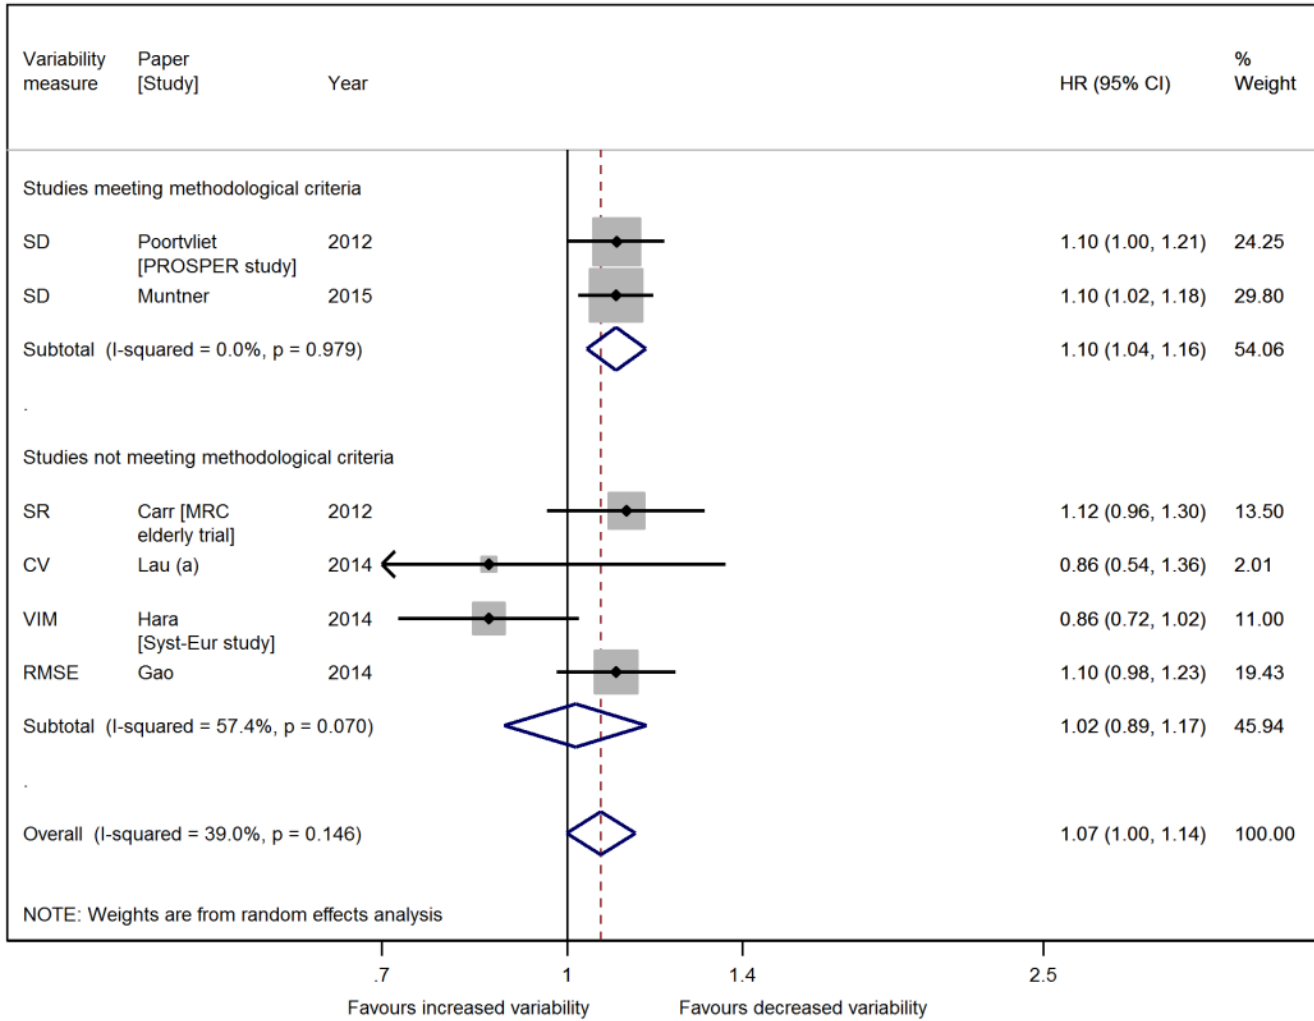

SD: Standard deviation, SR: Standardized residual, CV: Coefficient of variation, VIM: Variation independent of mean, RMSE: Root mean squared error

Figure e4

Random effects meta-analysis of standardized hazard ratios (HRs) for increases in clinic systolic blood pressure (BP) variability and myocardial infarction events

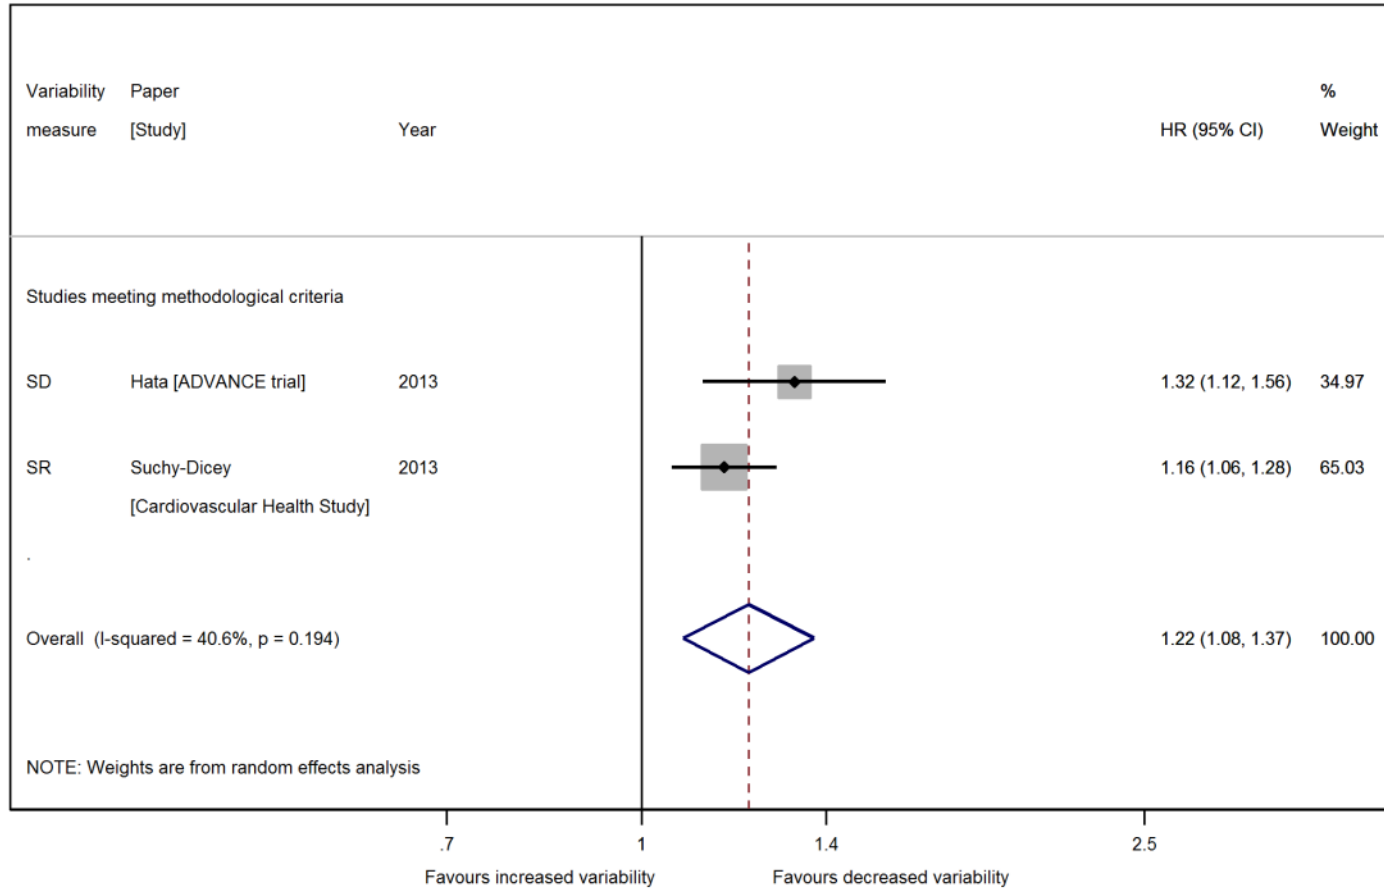

SD: Standard deviation, SR: Standardised residual

Supplementary data – mid-term variability in home BP

Table e7: Hazard ratios (HRs) for cardiovascular and mortality outcomes per standard deviation increase in home systolic blood pressure (BP) variability

| Outcome                              | Morning measurements |                               |                      | Evening measurements |                               |                      | Morning and evening measurements |                               |                      |
|--------------------------------------|----------------------|-------------------------------|----------------------|----------------------|-------------------------------|----------------------|----------------------------------|-------------------------------|----------------------|
|                                      | Variability measure  | Paper [Study], year           | HR (95% CI)          | Variability measure  | Paper [Study], year           | HR (95% CI)          | Variability measure              | Paper [Study], year           | HR (95% CI)          |
| <b>CVD mortality</b>                 | VIM                  | Asayama [Ohasama], 2013       | 1.26<br>(1.07, 1.49) | VIM                  | Asayama [Ohasama], 2013       | 1.23<br>(1.05, 1.45) | SD                               | Kikuya [Ohasama], 2008        | 1.16<br>(0.99, 1.36) |
| <b>CHD mortality</b>                 | SD                   | Hashimoto [Ohasama], 2012     | 0.84<br>(0.59, 1.19) | SD                   | Kikuya [Ohasama], 2008        | 0.99<br>(0.79, 1.25) | SD                               | Kikuya [Ohasama], 2008        | 1.02<br>(0.81, 1.29) |
| <b>Stroke mortality</b>              | SD                   | Hashimoto [Ohasama], 2012     | 1.47<br>(1.11, 1.95) | SD                   | Kikuya [Ohasama], 2008        | 1.38<br>(1.12, 1.70) | SD                               | Kikuya [Ohasama], 2008        | 1.31<br>(1.05, 1.64) |
| <b>Non-CVD mortality</b>             | SD                   | Kikuya [Ohasama], 2008        | 1.18<br>(1.04, 1.34) | SD                   | Kikuya [Ohasama], 2008        | 1.07<br>(0.94, 1.22) | SD                               | Kikuya [Ohasama], 2008        | 1.15<br>(1.01, 1.31) |
| <b>Cerebral infarction mortality</b> | SD                   | Hashimoto [Ohasama], 2012     | 1.88<br>(1.31, 2.69) | SD                   | Kikuya [Ohasama], 2008        | 1.42<br>(1.08, 1.86) | SD                               | Kikuya [Ohasama], 2008        | 1.47<br>(1.11, 1.95) |
| <b>CVD events</b>                    | SD                   | Johansson [Health 2000], 2012 | 1.17<br>(1.02, 1.34) | SD                   | Johansson [Health 2000], 2012 | 1.08<br>(0.93, 1.26) | SD                               | Johansson [Health 2000], 2012 | 1.06<br>(0.93, 1.22) |
| <b>Stroke events</b>                 | VIM                  | Asayama [Ohasama], 2013       | 1.14<br>(1.00, 1.30) | VIM                  | Asayama [Ohasama], 2013       | 1.06<br>(0.93, 1.21) | -                                | -                             | -                    |

Supplementary data – short term variability in ambulatory BP (daytime)

Figure e5

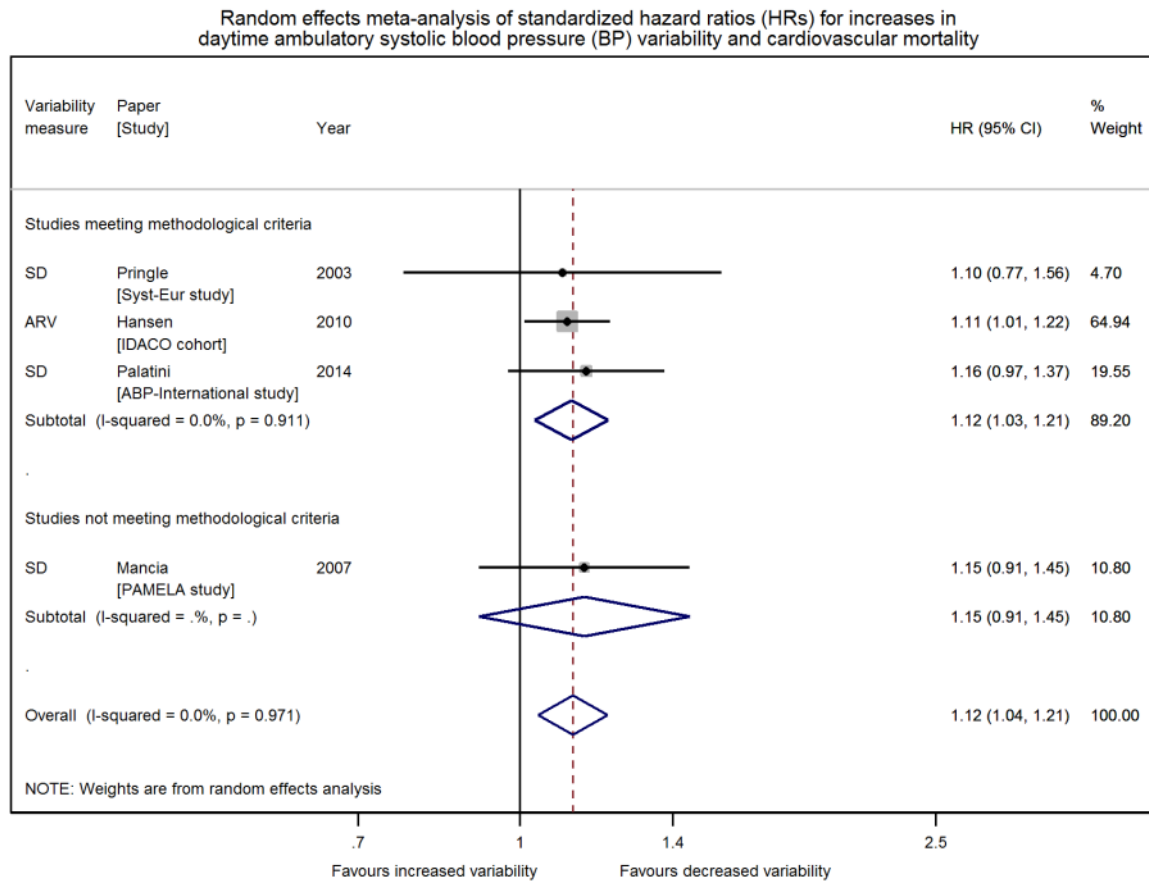

SD: Standard deviation, ARV: Average real variability

Figure e6

Random effects meta-analysis of standardized hazard ratios (HRs) for increases in daytime ambulatory systolic blood pressure (BP) variability and stroke events

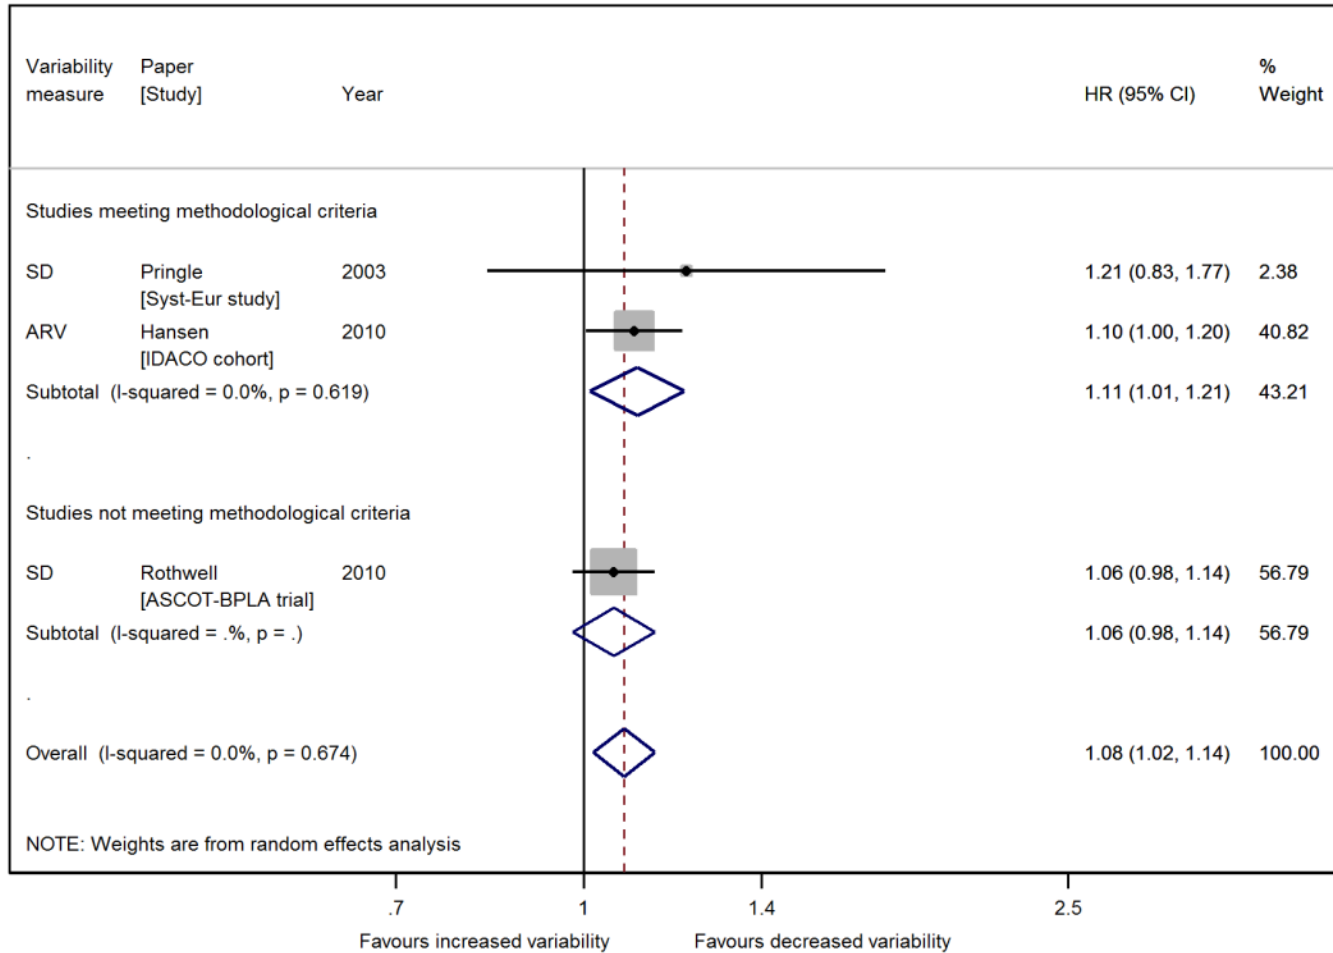

SD: Standard deviation, ARV: Average real variability



Figure e7

Random effects meta-analysis of standardized hazard ratios (HRs) for increases in daytime ambulatory systolic blood pressure (BP) variability and cardiovascular events

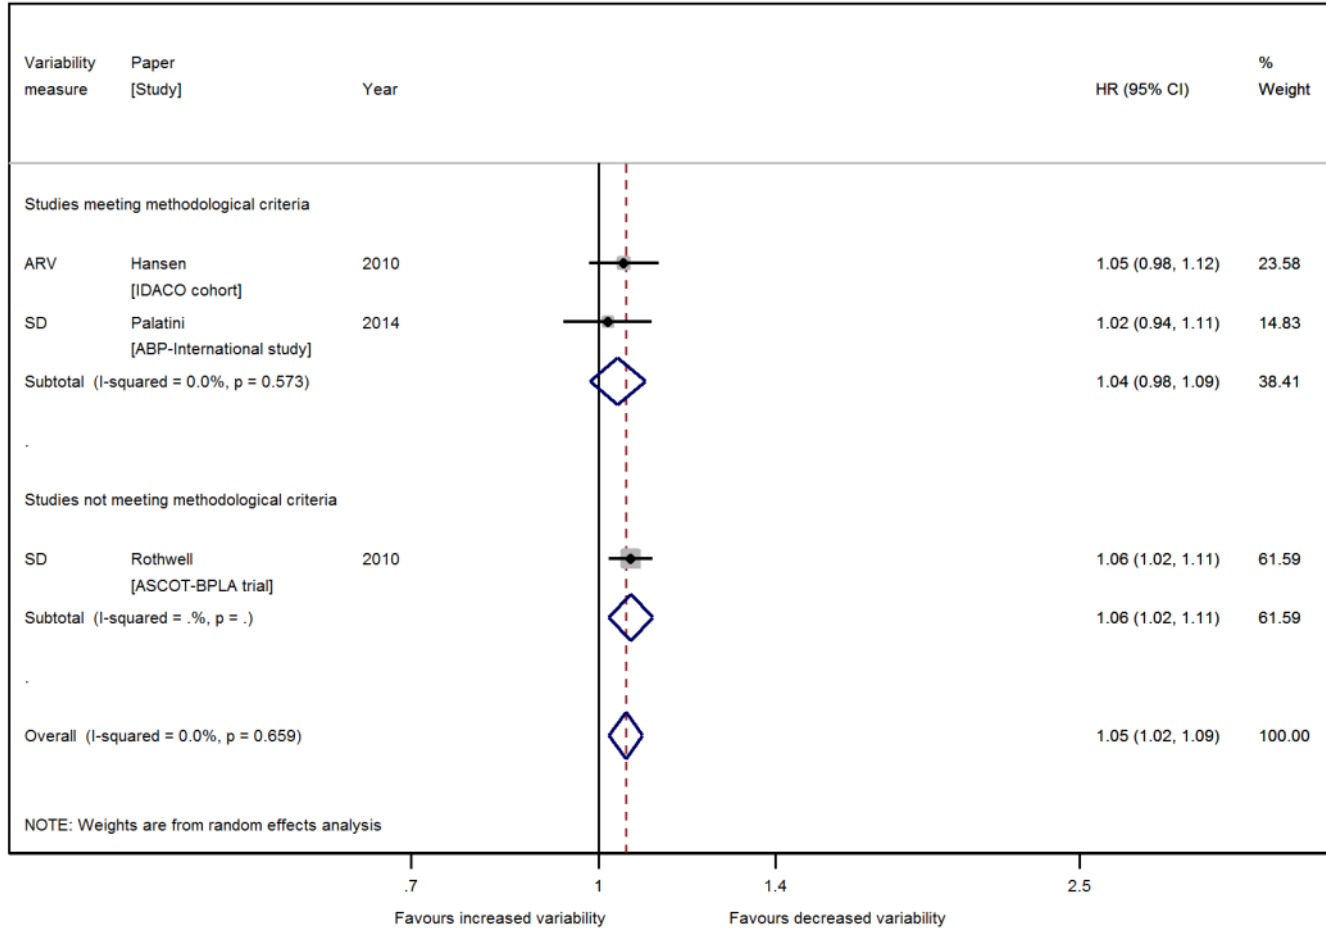

SD: Standard deviation, ARV: Average real variability

Figure e8

Random effects meta-analysis of standardized hazard ratios (HRs) for increases in daytime ambulatory systolic blood pressure (BP) variability and coronary heart disease events

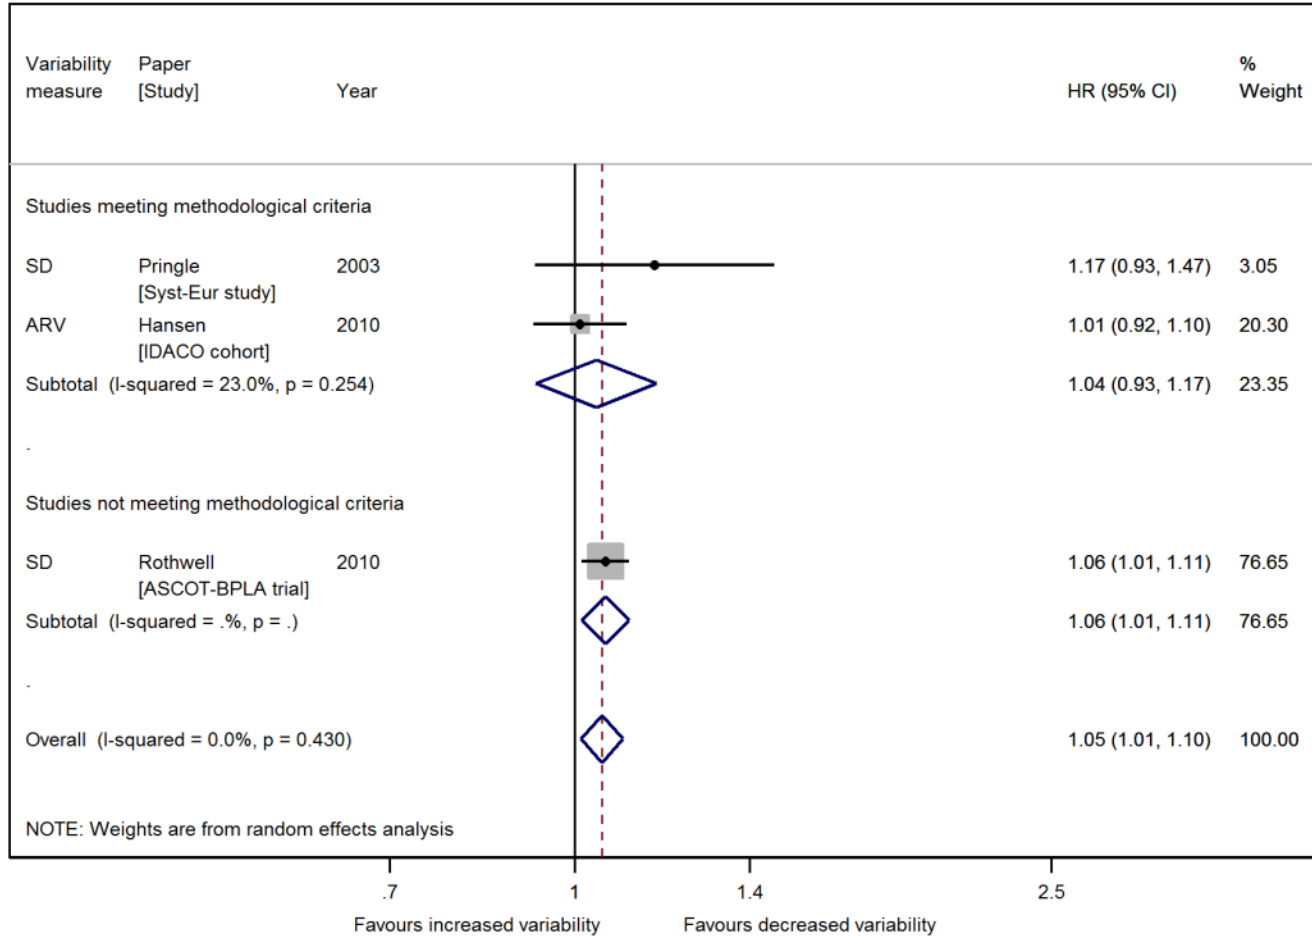

SD: Standard deviation, ARV: Average real variability

Supplementary data – short term variability in ambulatory BP (night-time)

Figure e9

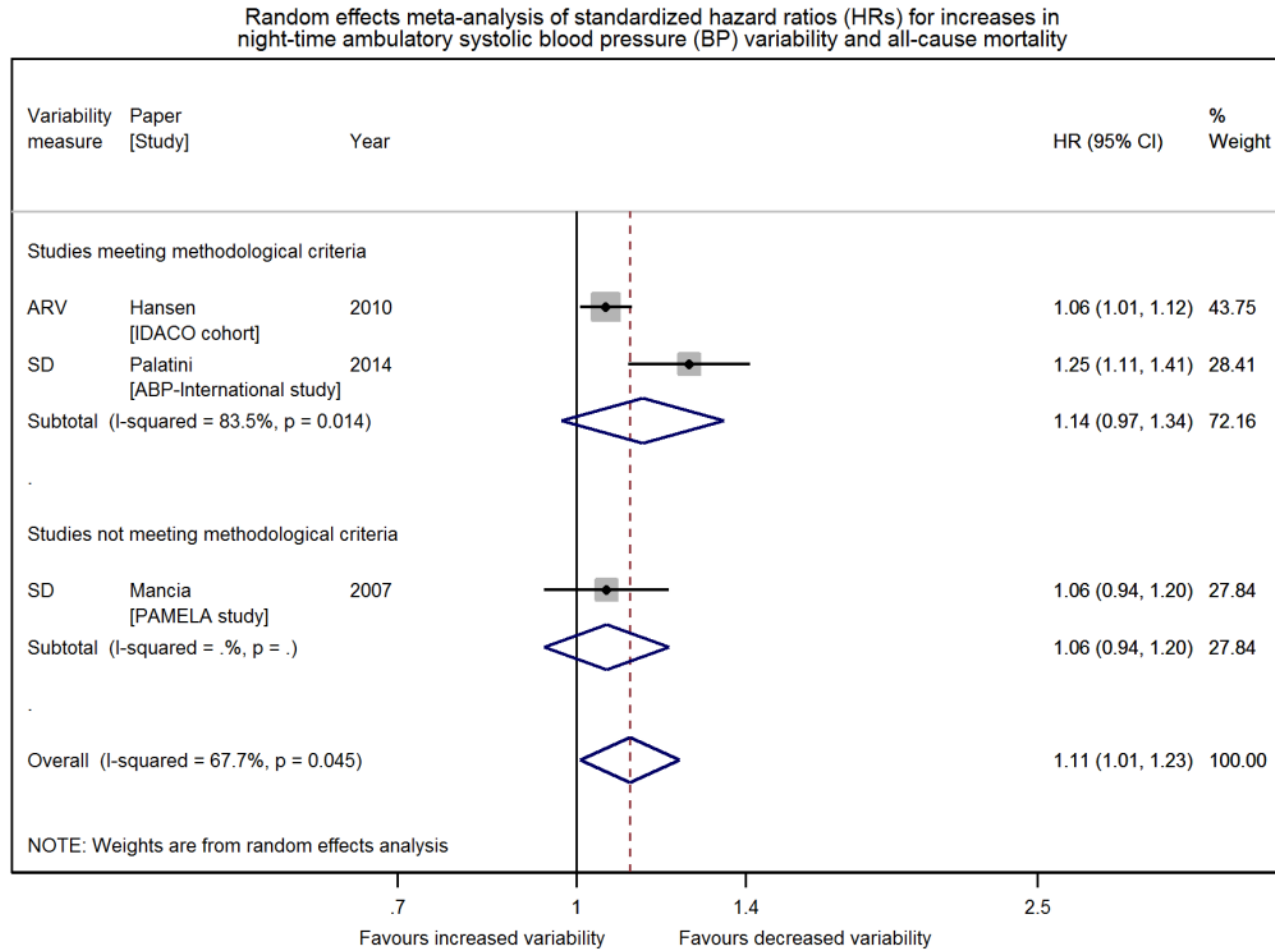

ARV: Average real variability, SD: Standard deviation

Figure e10

Random effects meta-analysis of standardized hazard ratios (HRs) for increases in night-time ambulatory systolic blood pressure (BP) variability and cardiovascular mortality

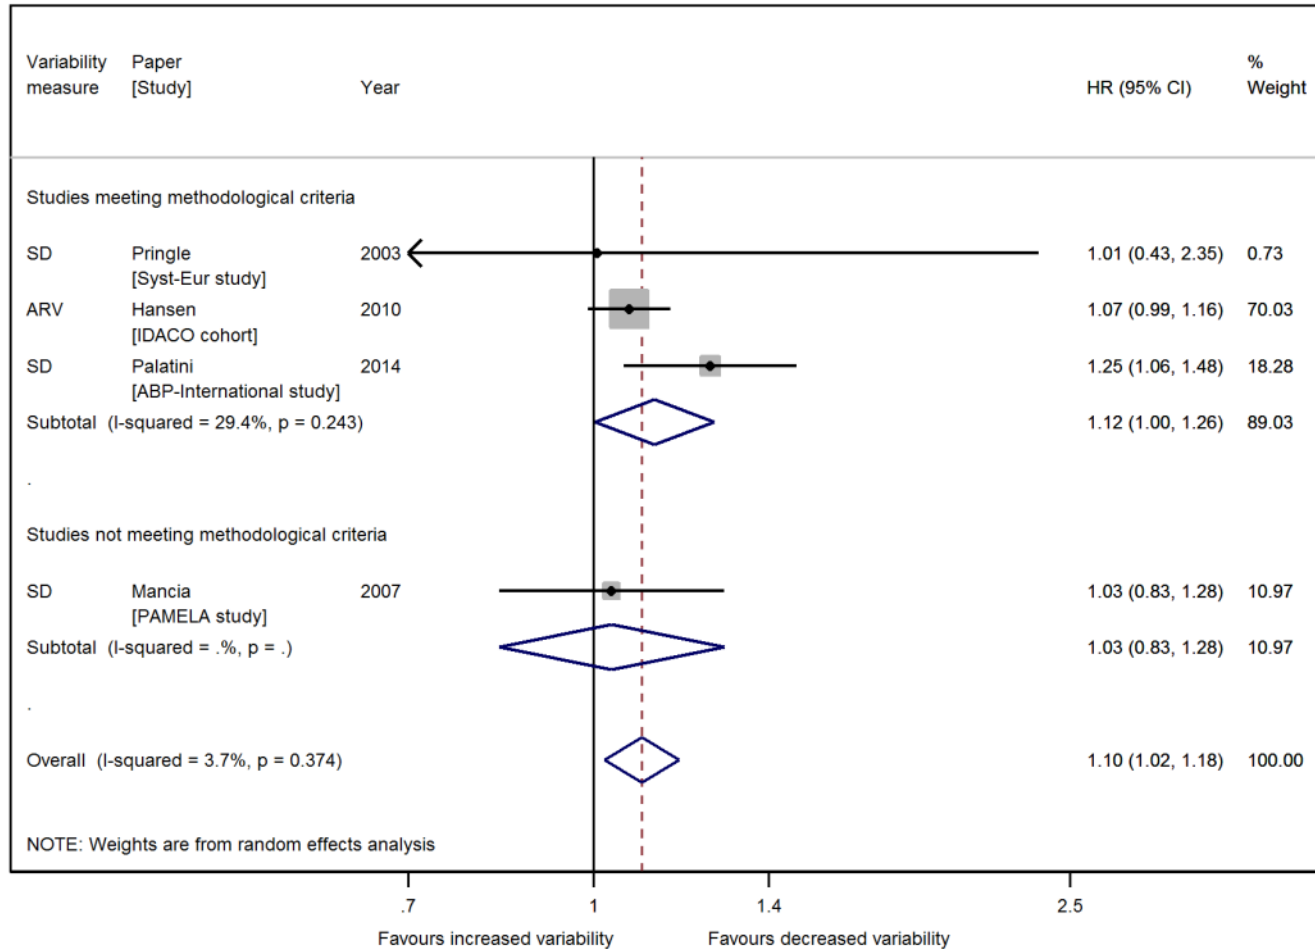

SD: Standard deviation, ARV: Average real variability

Figure e11

Random effects meta-analysis of standardized hazard ratios (HRs) for increases in night-time ambulatory systolic blood pressure (BP) variability and stroke events

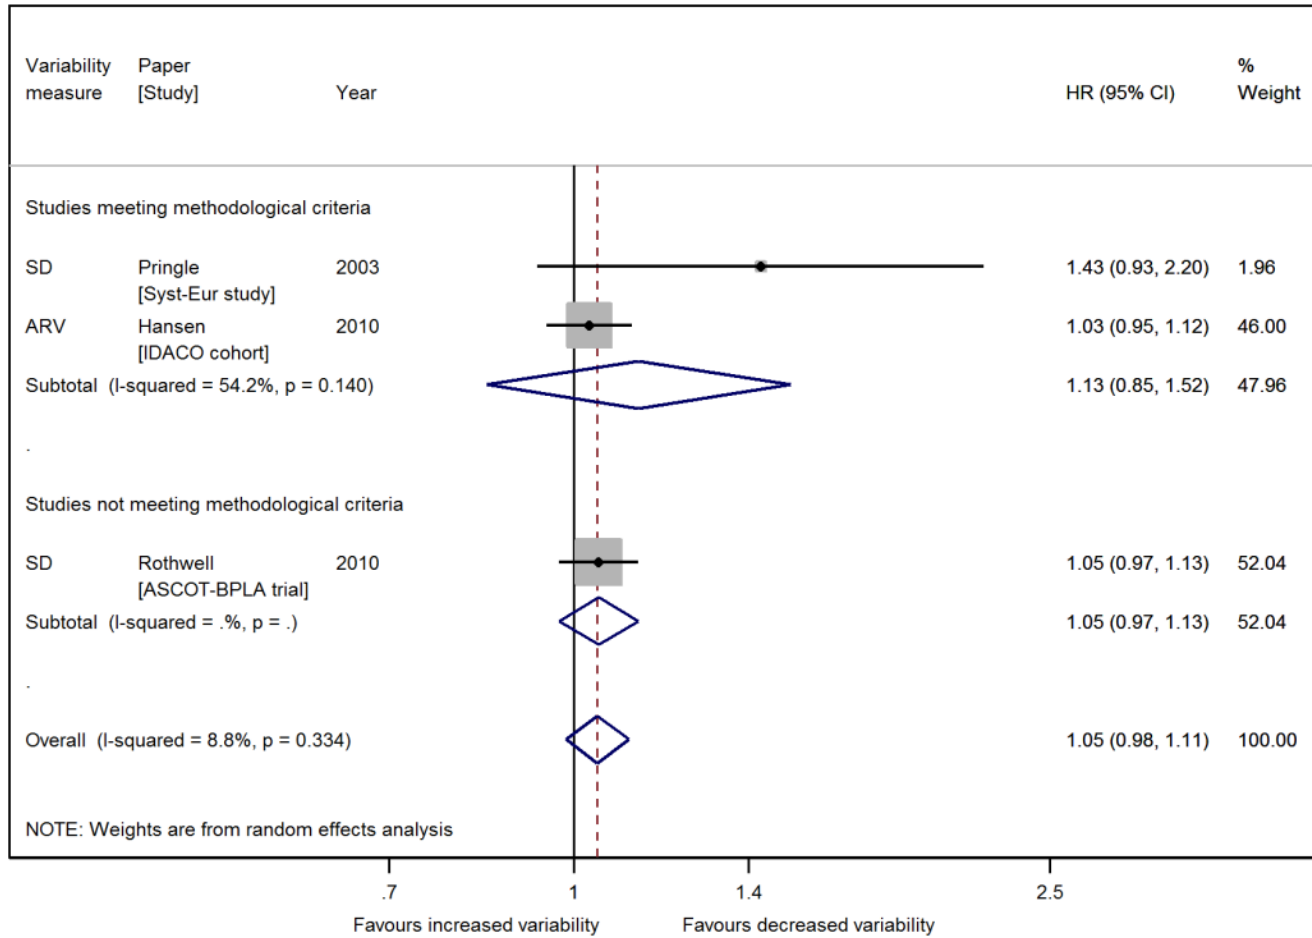

SD: Standard deviation, ARV: Average real variability

Figure e12

Random effects meta-analysis of standardized hazard ratios (HRs) for increases in night-time ambulatory systolic blood pressure (BP) variability and cardiovascular events

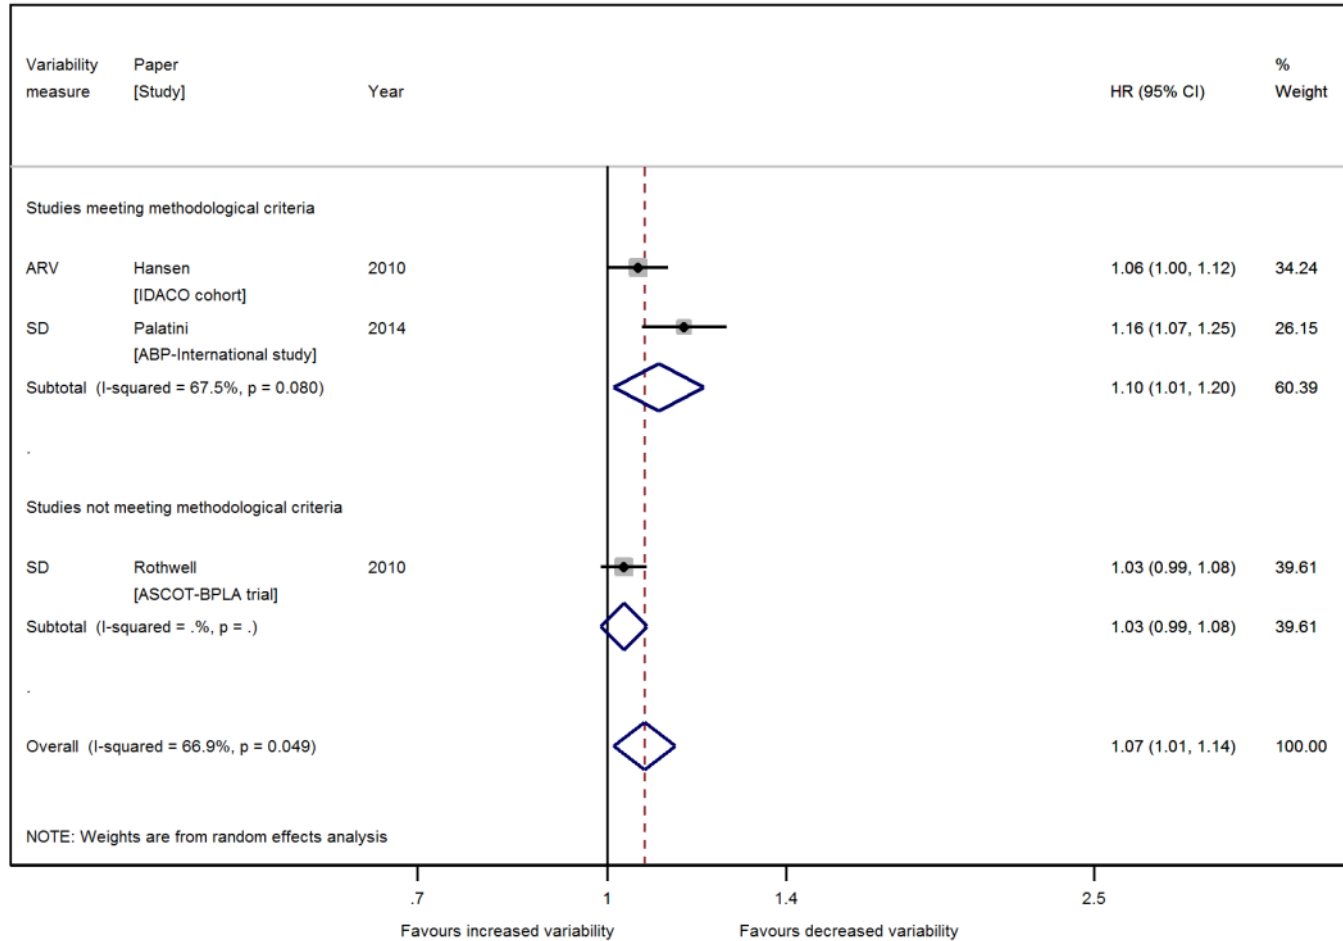

SD: Standard deviation, ARV: Average real variability

Figure e13

Random effects meta-analysis of standardized hazard ratios (HRs) for increases in night-time ambulatory systolic blood pressure (BP) variability and coronary heart disease events

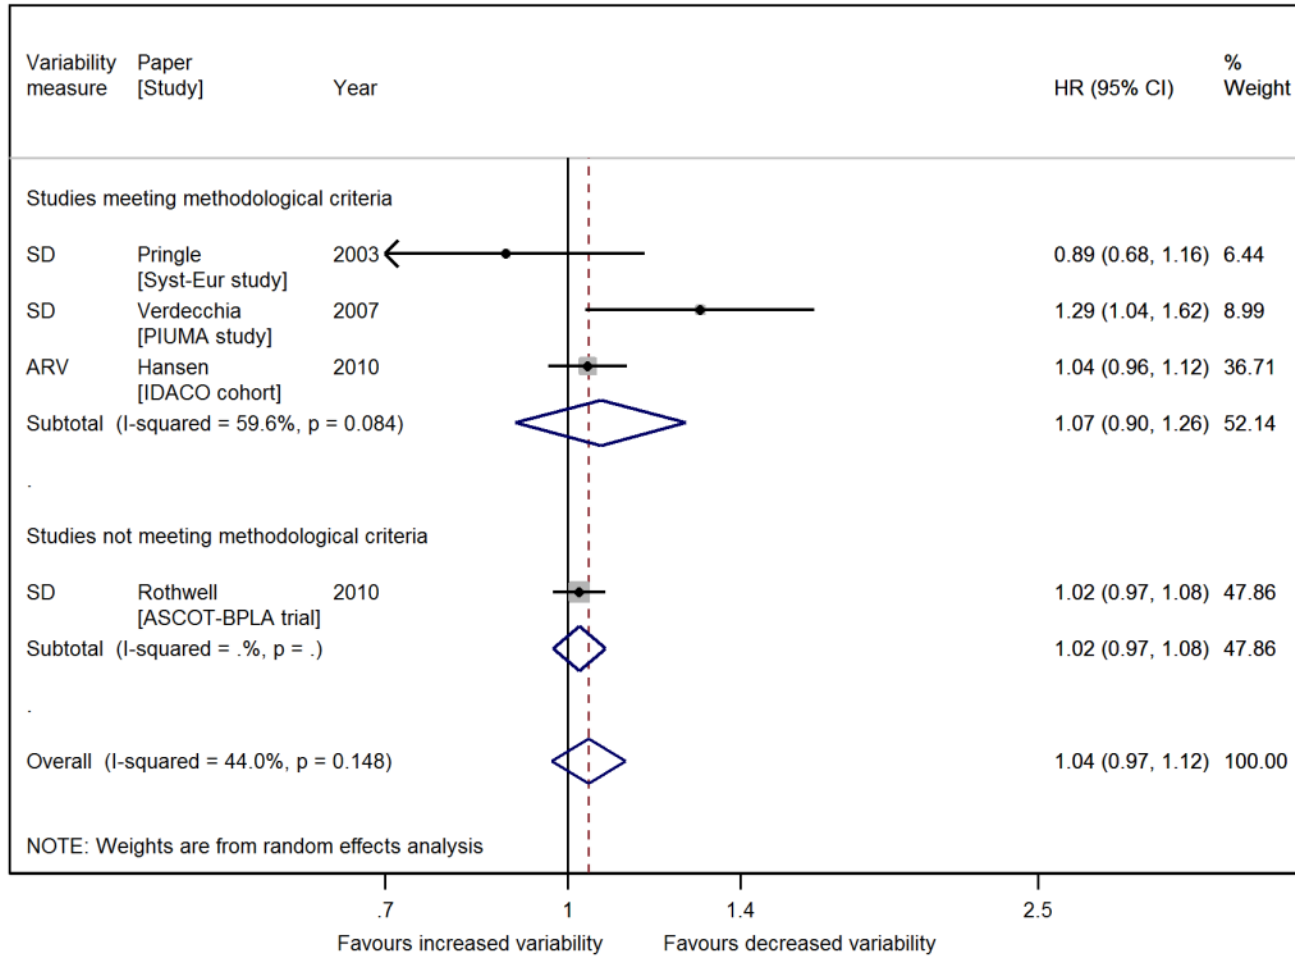

SD: Standard deviation, ARV: Average real variability

Supplementary data – short term variability in ambulatory BP (24-hour)

Figure e14

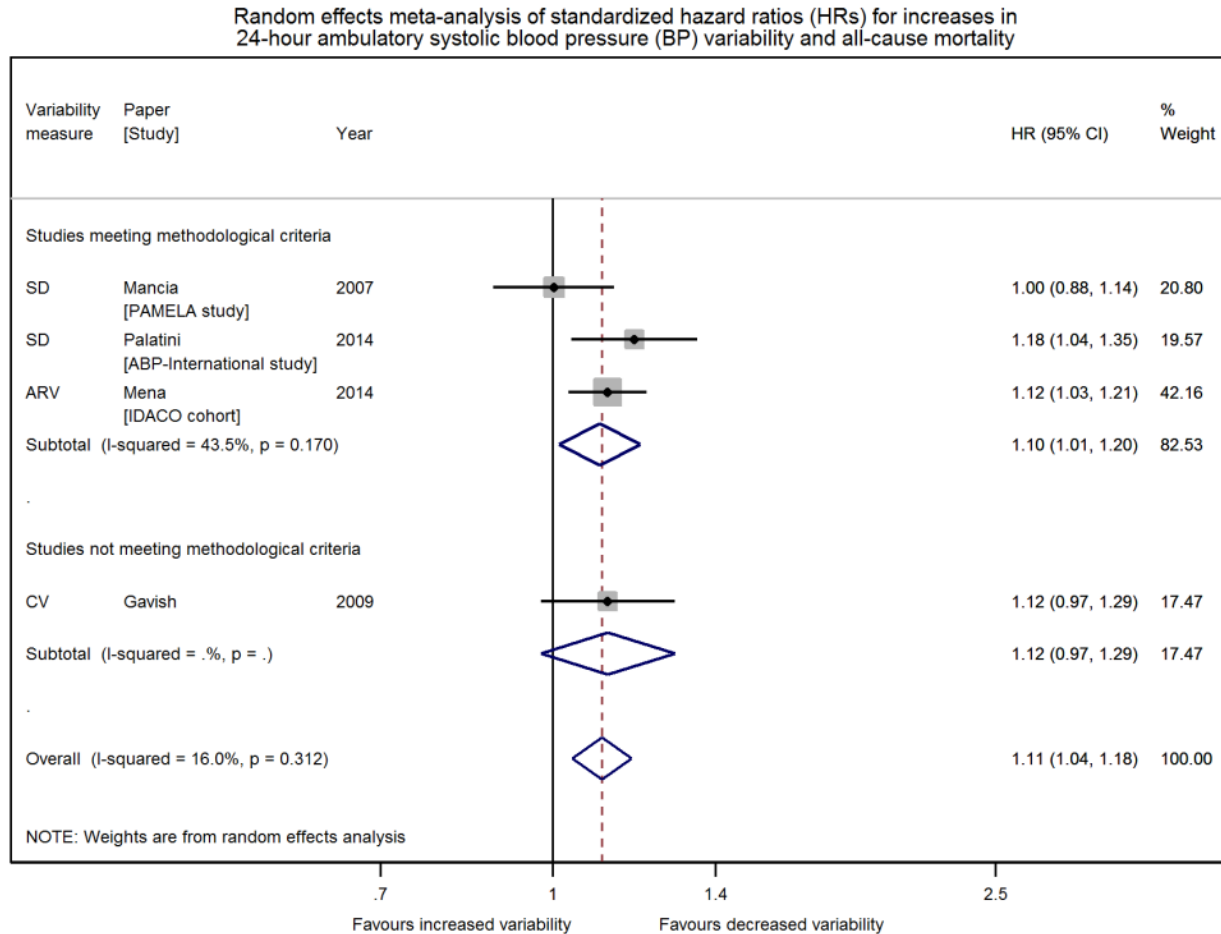

SD: Standard deviation, ARV: Average real variability, CV: Coefficient of variation



Figure e15

Random effects meta-analysis of standardized hazard ratios (HRs) for increases in 24-hour ambulatory systolic blood pressure (BP) variability and cardiovascular mortality

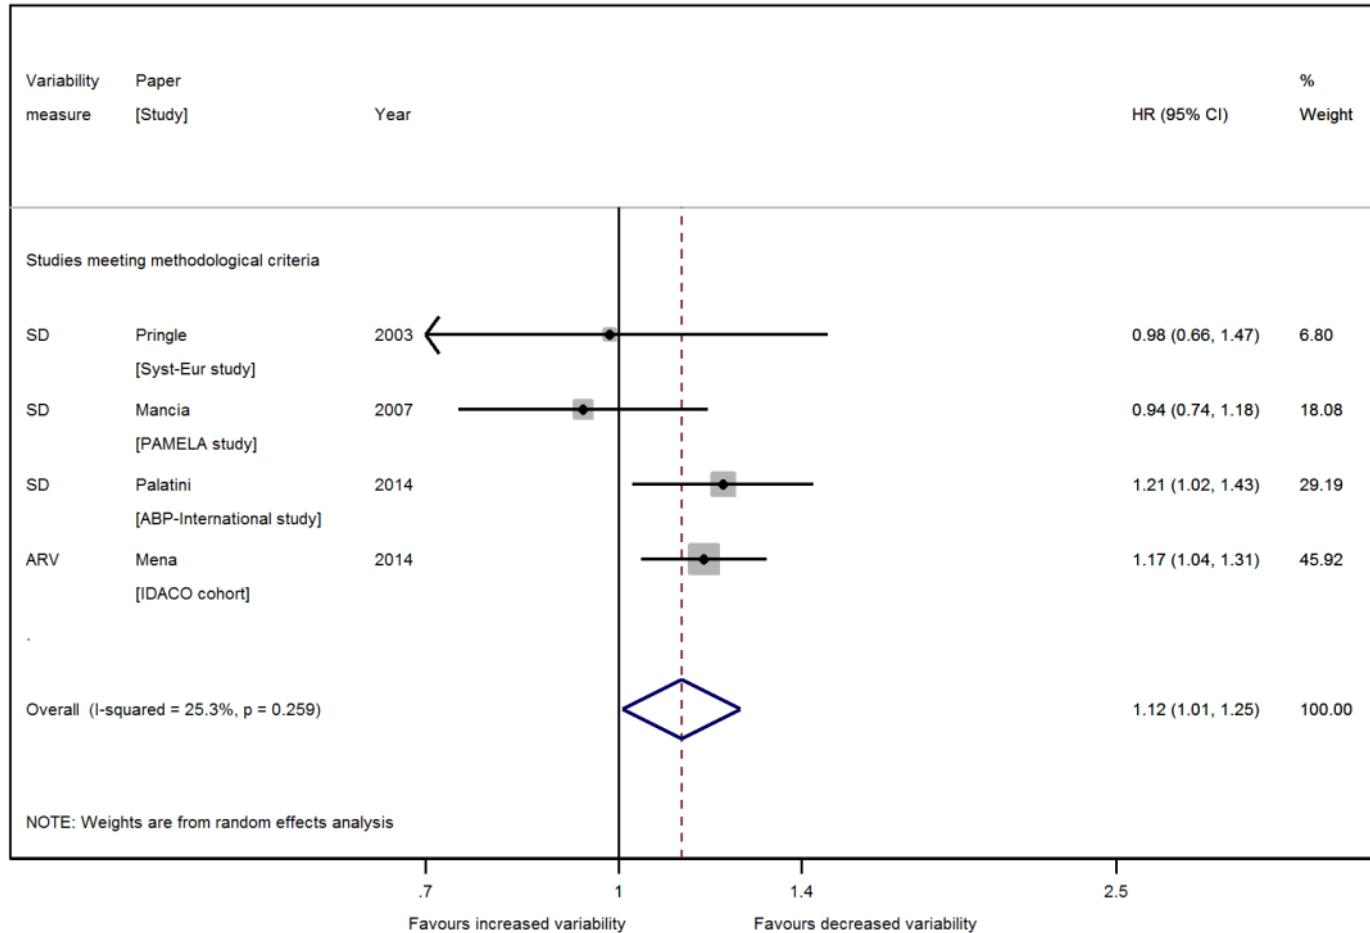

SD: Standard deviation, ARV: Average real variability

Figure e16

Random effects meta-analysis of standardized hazard ratios (HRs) for increases in 24-hour ambulatory systolic blood pressure (BP) variability and stroke events

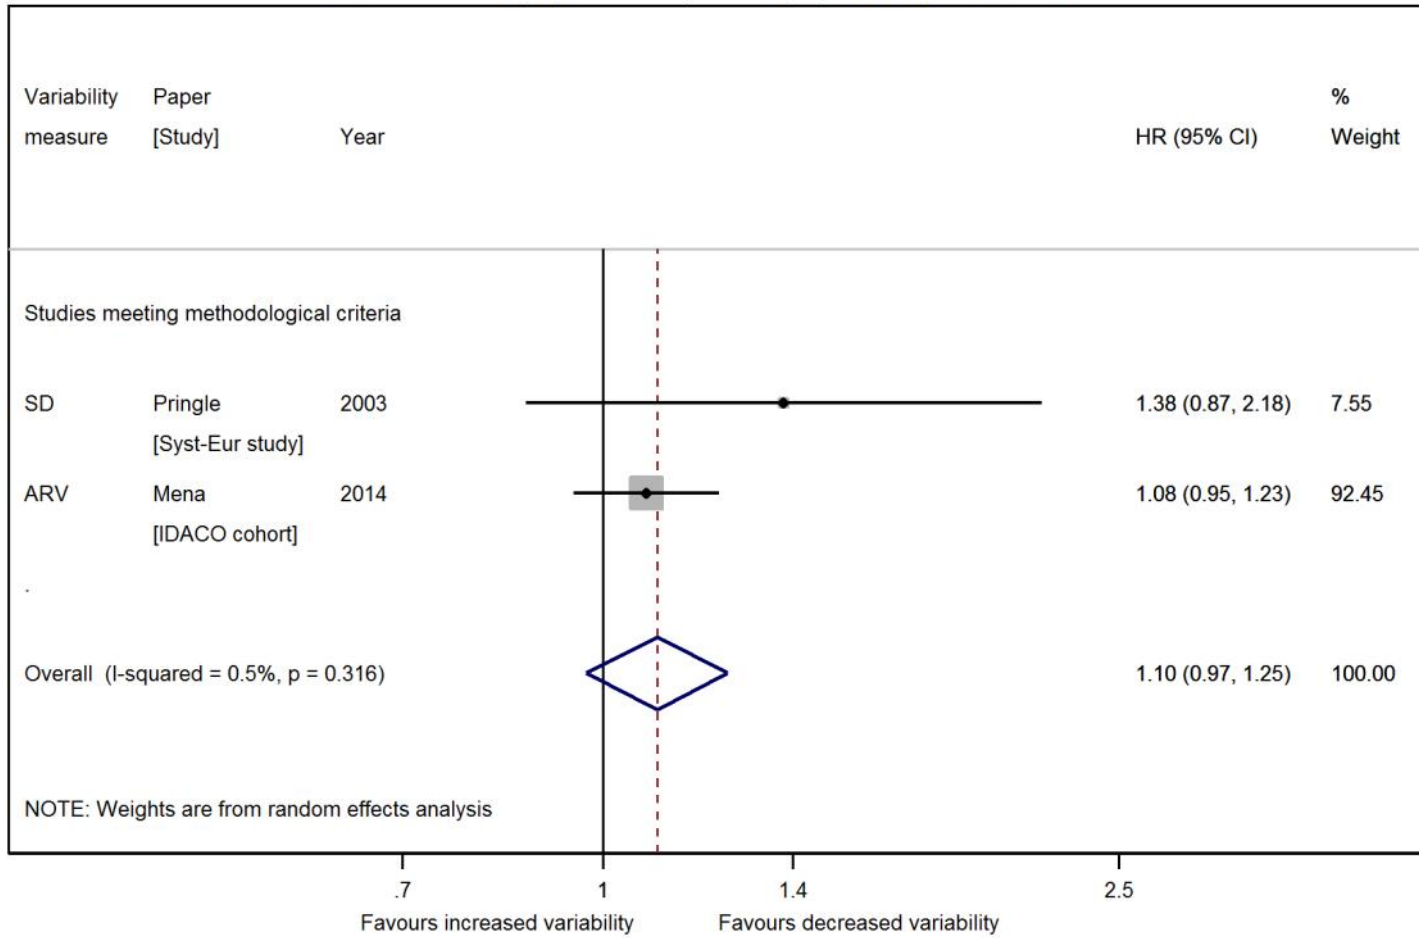

SD: Standard deviation, ARV: Average real variability

Figure e17

Random effects meta-analysis of standardized hazard ratios (HRs) for increases in 24-hour ambulatory systolic blood pressure (BP) variability and cardiovascular events

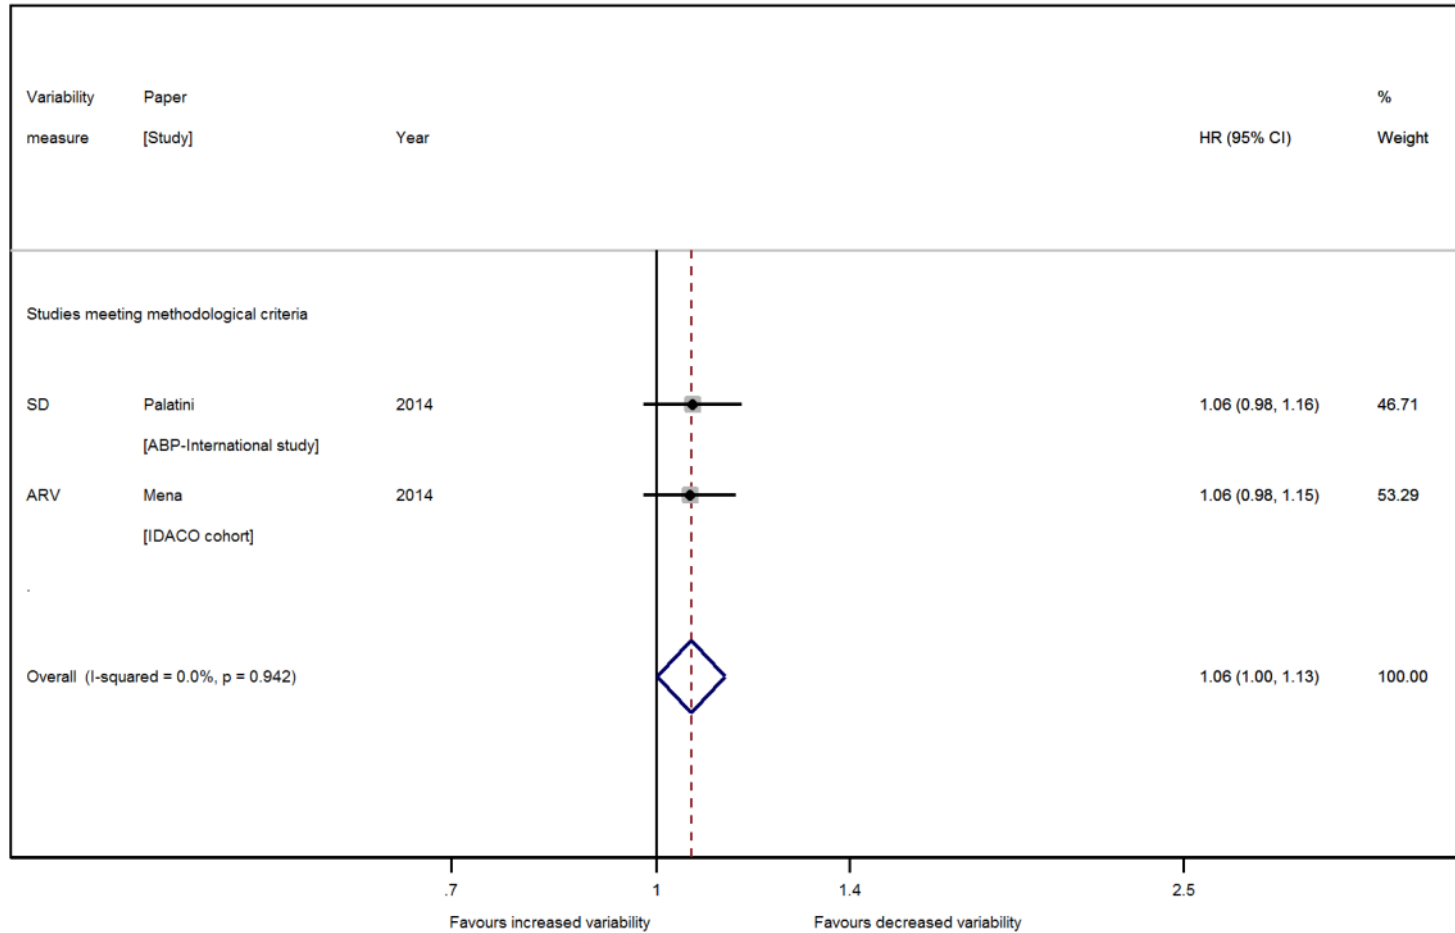

ARV: Average real variability

Figure e18

Random effects meta-analysis of standardized hazard ratios (HRs) for increases in 24-hour ambulatory systolic blood pressure (BP) variability and coronary heart disease events

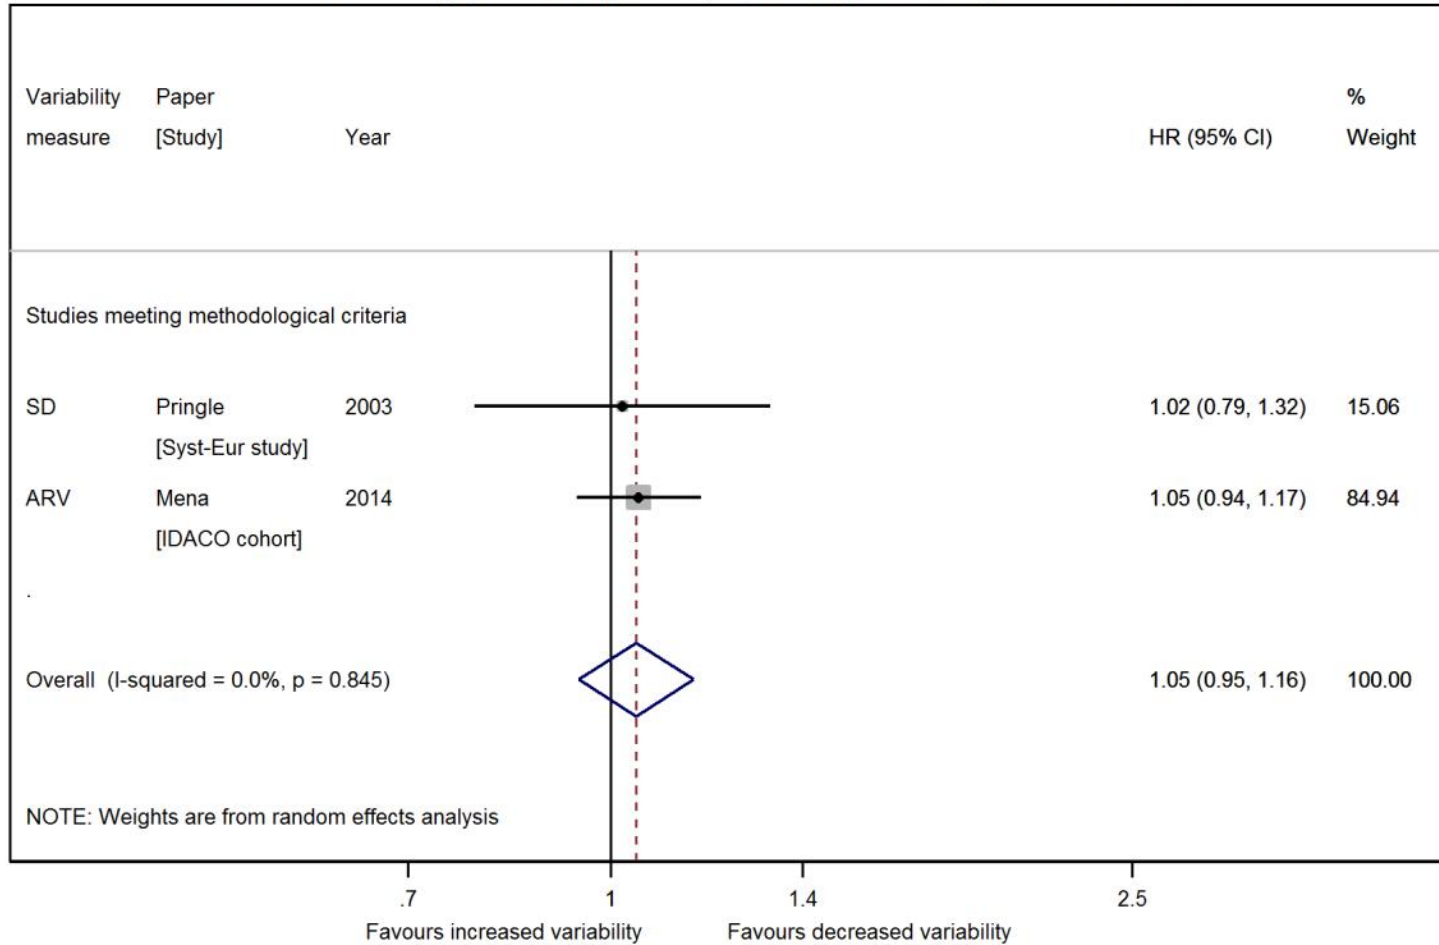

SD: Standard deviation, ARV: Average real variability
